# Posterior marginalization accelerates Bayesian inference for dynamical systems

Elba Raimúndez<sup>1,2</sup>, Michael Fedders<sup>1</sup> and Jan Hasenauer<sup>1,2,3,\*</sup>

<sup>1</sup> Life and Medical Sciences (LIMES) Institute, University of Bonn, Bonn, Germany

<sup>2</sup> Technische Universität München, Center for Mathematics, Garching, Germany

<sup>3</sup> Helmholtz Zentrum München - German Research Center for Environmental Health, Computational Health Center, Neuherberg, Germany

\* Corresponding author: Jan Hasenauer ([jan.hasenauer@uni-bonn.de](mailto:jan.hasenauer@uni-bonn.de))

## 1 Abstract

2 Bayesian inference is an important method in the life and natural sciences for learning from  
3 data. It provides information about parameter uncertainties, and thereby the reliability  
4 of models and their predictions. Yet, generating representative samples from the Bayesian  
5 posterior distribution is often computationally challenging. Here, we present an approach  
6 that lowers the computational complexity of sample generation for problems with scaling,  
7 offset and noise parameters. The proposed method is based on the marginalization of the  
8 posterior distribution, which reduces the dimensionality of the sampling problem. We provide  
9 analytical results for a broad class of problems and show that the method is suitable for a  
10 large number of applications. Subsequently, we demonstrate the benefit of the approach  
11 for various application examples from the field of systems biology. We report a substantial  
12 improvement up to 50 times in the effective sample size per unit of time, in particular when  
13 applied to multi-modal posterior problems. As the scheme is broadly applicable, it will  
14 facilitate Bayesian inference in different research fields.

## 15 Introduction

16 Mathematical models are important tools for understanding and predicting the dynamics of  
17 many processes, such as signaling processing in biological systems [1–3], patient progression  
18 [4, 5] and epidemics [6, 7]. However, the parameters of mathematical models are in general  
19 unknown and need to be inferred from experimental data. This is an inherently challenging  
20 problem and complicated by the fact that, in addition to the dynamical properties of interest  
21 (e.g. rate constants and initial conditions), also characteristics of the measurement process  
22 may be unknown. In systems biology, most measurement techniques, including Western  
23 blotting [8], fluorescence microscopy [9] and mass spectrometry [10], are not fully quantitative  
24 but provide only relative information. Moreover, there is often an unknown offset and/or  
25 noise level [11]. Accordingly, unknown observation parameters, such as scaling factors but  
26 also offsets and noise levels, have to be estimated along with parameters of the mathematical  
27 models [12–14].

28 Bayesian inference is often used to determine unknown parameters [15–17]. A particularly  
29 common approach is to employ Markov chain Monte Carlo (MCMC) algorithms, such as  
30 (adaptive) Metropolis Hastings [18], Hamiltonian Monte Carlo methods [19, 20] and paral-  
31 lel tempering [21], to generate representative samples from the posterior distribution. Yet,  
32 with increasing number of unknown parameters, the application of MCMC algorithms be-  
33 comes challenging [22]. This is a bottleneck that leaves sampling methods on the edge of  
34 computational feasibility. In principle, the challenge can be addressed by reducing the di-  
35 mensionality of the sampling problem, e.g., by marginalizing over nuisance parameters (as  
36 e.g. demonstrated in cosmology [23]). However, there is no generic and broadly applicable  
37 framework.

38 In frequentist inference, a template for the reduction of the dimensionality of parameter esti-  
39 mation problems has been provided [14, 24, 25]. Here, hierarchical optimization approaches  
40 have been developed to determine the maximum likelihood estimate. These methods ex-  
41 ploit that the observation parameters can be computed analytically for a given set of model  
42 parameters. It has been shown that this benefits the convergence of optimization methods  
43 and the computational efficiency, while providing the same results (see, e.g. [24]). Yet, these  
44 concepts cannot be directly translated to Bayesian inference as we are not interested in only  
45 optimal point estimates, but in (marginal) posterior distributions over parameters.

46 In this manuscript, we introduce a generic method for improving sampling efficiency by  
47 marginalizing over observation parameters. We provide analytical results for the marginal-  
48 ization over complex posterior distributions for a broad class of observation models. The  
49 marginalization yields a lower dimensional posterior for MCMC sampling. Samples of the  
50 original posterior can be obtained by subsequent sampling of the observation parameters  
51 conditioned on the remaining parameters. To illustrate the properties of the proposed

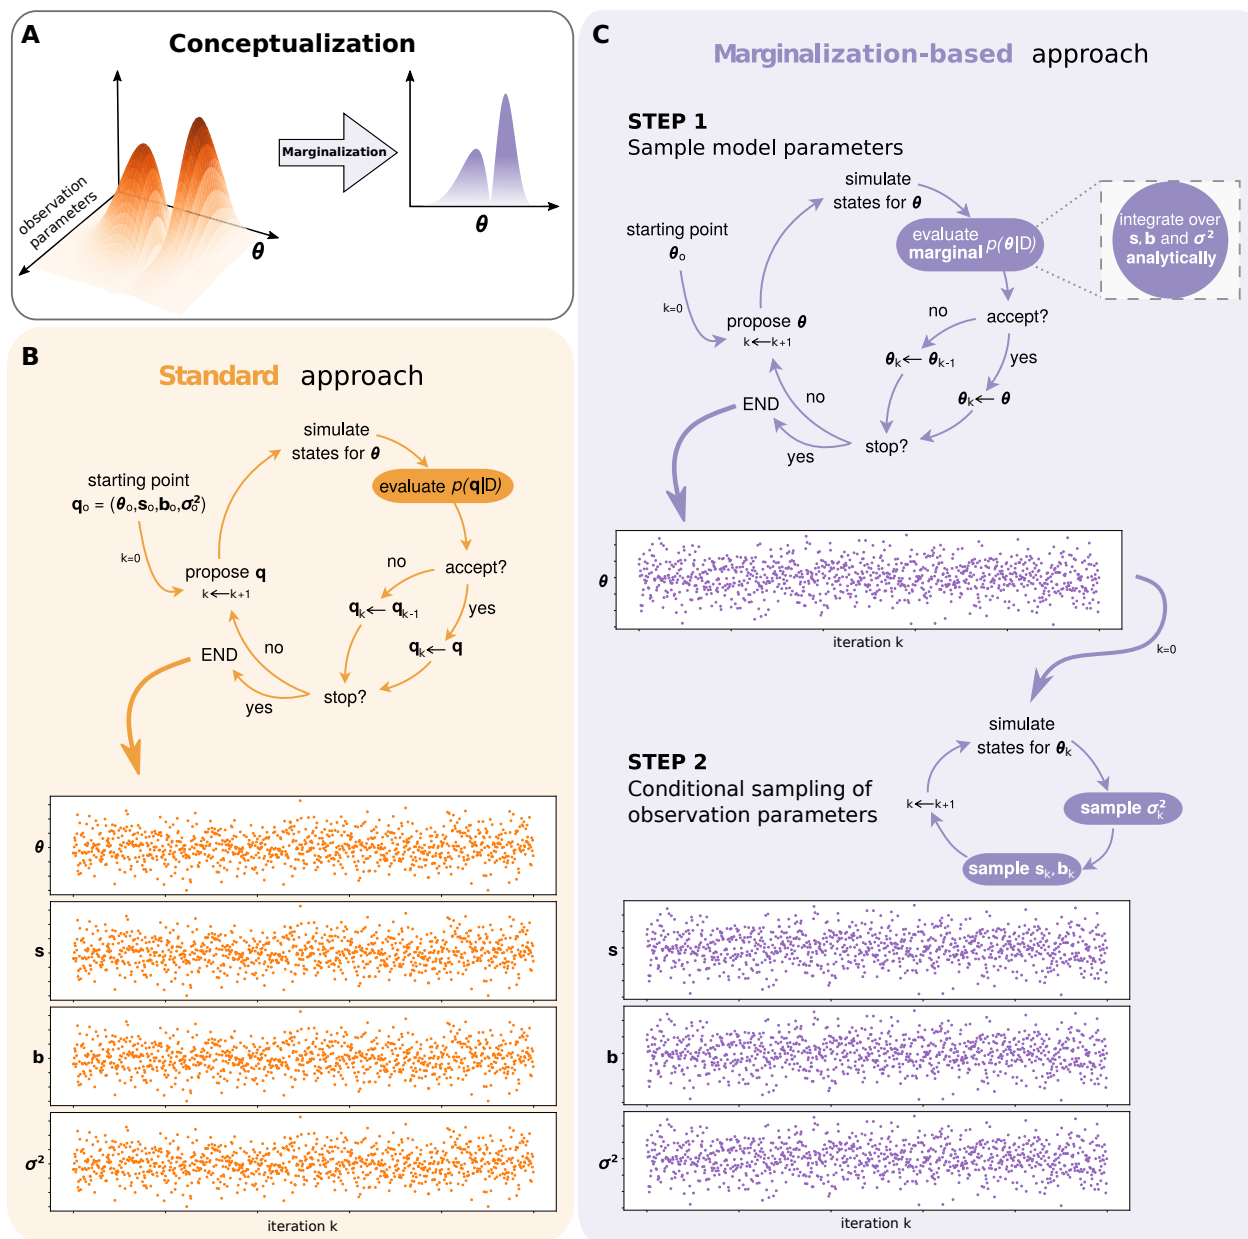

Figure 1: **Standard and marginalization-based Markov chain Monte-Carlo sampling.** (A) Illustration of the general marginalization concept. (B) Standard approach. (C) Marginalization-based approach depicting: (Step 1) the sequential integration of the observation parameters  $s$ ,  $b$  and  $\sigma^2$  to evaluate  $p(\theta | \mathcal{D})$ , and (Step 2) the (optional) conditional sampling of the marginalized observation parameters.

52 approach, we benchmark its performance with a collection of published models, including  
 53 models for which current available sampling strategies are computationally infeasible. We  
 54 demonstrate that the proposed method achieves higher sampling efficiencies by reducing the  
 55 auto-correlation of the samples and increasing the transition probabilities between posterior

56 modes. Indeed, it turns a computationally infeasible sampling problems feasible, increasing  
57 the set of problems which can be tackled using Bayesian inference.

## 58 Results

### 59 Many model structures allow for analytical marginalization of pa- 60 rameters and sampling in lower dimensional space

61 To facilitate Bayesian inference for mathematical models with observation parameters, we  
62 developed and implemented a marginalization-based sampling approach (Figure 1). The  
63 approach allows for inferring the parameters of mathematical models, such as ordinary dif-  
64 ferential equation (ODEs) and partial differential equation models, from data via observation  
65 models with scaling, offset and noise parameters. For the case of a mathematical model with  
66 parameter  $\theta$  and time- and parameter-dependent states  $x(t, \theta)$ , we consider for the case of a  
67 one-dimensional observable with additive Gaussian measurement noise the observation model

$$\bar{y} = (s \cdot h(x(t, \theta), \theta) + b) + \epsilon, \quad \text{with } \epsilon \sim \mathcal{N}(0, \sigma^2) \quad (1)$$

68 in which  $h(x, \theta)$  is the observable map,  $s$  is the scaling factor,  $b$  is the offset and  $\sigma^2$  is the  
69 variance of the measurement noise. Following Bayes' theorem, the posterior distribution is  
70 given by

$$p(\theta, s, b, \sigma^2 | \mathcal{D}) = \frac{p(\mathcal{D} | \theta, s, b, \sigma^2)p(\theta)p(s, b, \sigma^2)}{p(\mathcal{D})}, \quad (2)$$

71 in which  $p(\mathcal{D} | \theta, s, b, \sigma^2)$  denotes the likelihood of the data  $\mathcal{D}$ ,  $p(\theta, s, b, \sigma^2) = p(\theta)p(s, b, \sigma^2)$   
72 denotes the prior distribution, and  $p(\mathcal{D})$  denotes the marginal probability of the data.

73 The **standard approach** is to use MCMC methods to obtain representative samples from the  
74 joint posterior distribution for model parameters  $\theta$  and observation parameters  $s, b$  and  $\sigma^2$  (2)  
75 for subsequent analysis (Figure 1B). All parameters are sampled jointly, disregarding their  
76 nature (Figure 1B), in particular note that the state  $x(t, \theta)$  and the value of the observation  
77 map  $h(x(t, \theta), \theta)$  only depends on  $\theta$  but not on  $s, b$  or  $\sigma^2$ . This approach is often challenging  
78 and even infeasible for models with large datasets, since the number of observation parameters  
79 can easily exceed the number of model parameters (see e.g. [26, 27]).

To simplify the sampling process, we propose a **marginalization-based approach**, which  
exploits a decomposition of the sampling problem in two steps (Figure 1C). In Step 1, we  
consider the marginalization of the posterior distribution (2) with respect to the observation  
parameters  $s, b$  and  $\sigma^2$ , yielding

$$p(\theta | \mathcal{D}) = \frac{p(\mathcal{D} | \theta)p(\theta)}{p(\mathcal{D})}$$



80 with  $p(\mathcal{D} | \theta)$  as the marginal likelihood given by

$$p(\mathcal{D} | \theta) = \int_0^\infty \int_{-\infty}^\infty \int_{-\infty}^\infty p(\mathcal{D} | \theta, s, b, \sigma^2) p(s, b, \sigma^2) ds db d\sigma^2. \quad (3)$$

81 For various choices of noise models and prior distributions (in particular conjugate priors),  
 82 this marginal likelihood can be computed in closed-form. This is for instance the case for the  
 83 combination of additive Gaussian noise with a joint prior distribution for  $s$ ,  $b$  and  $\sigma^2$ ,

$$p(s, b, \sigma^2) = \mathcal{N}(s | \nu, \sigma^2/\tau) \cdot \mathcal{N}(b | \mu, \sigma^2/\kappa) \cdot \Gamma^{-1}(\sigma^2 | \alpha, \beta),$$

84 in which  $\nu, \mu \in \mathbb{R}$  and  $\tau, \kappa, \alpha, \beta \in \mathbb{R}_+$  denote hyperparameters of the Normal-Inverse-Gamma-  
 85 distributed joint prior, and  $\Gamma^{-1}(\cdot)$  the Inverse-Gamma function. Here, we obtain for obser-  
 86 vations  $\bar{y}_i$  with  $i = 1, \dots, n_t$  the closed-form expression for the marginal likelihood as

$$p(\mathcal{D} | \theta) = \frac{(\beta/C)^\alpha}{\Gamma(\alpha)(2\pi C)^{n_t/2}} \cdot \Gamma\left(\alpha + \frac{n_t}{2}\right) \cdot \sqrt{\frac{\kappa\tau}{(n_t + \kappa)(\tau + \sum_{i=1}^{n_t} h_i^2) - (\sum_{i=1}^{n_t} h_i)^2}} \quad (4)$$

87 with  $h_i := h(x(t_i, \theta), \theta)$  and parameter-dependent constant

$$C := \beta + \frac{1}{2} \left( \kappa\mu^2 + \tau\nu^2 + \sum_{i=1}^{n_t} \bar{y}_i^2 - \frac{(\kappa\mu + \sum_{i=1}^{n_t} \bar{y}_i)^2}{n_t + \kappa} - \frac{((\kappa\mu + \sum_{i=1}^{n_t} \bar{y}_i)(\sum_{i=1}^{n_t} h_i) - (n_t + \kappa)(\tau\nu + \sum_{i=1}^{n_t} h_i \bar{y}_i))^2}{(n_t + \kappa) \left( (n_t + \kappa)(\tau + \sum_{i=1}^{n_t} h_i^2) - (\sum_{i=1}^{n_t} h_i)^2 \right)} \right).$$

88 The combination of additive Gaussian noise and Normal-Inverse-Gamma prior is a com-  
 89 mon choice of conjugate distributions, which allow for an analytically tractable marginal  
 90 likelihood. There are various other cases, including multiplicative Gaussian noise and even  
 91 distributions with outliers. For the latter, Laplacian noise has shown to be more robust  
 92 against measurement outliers [28]. Supplementary Tables S1–S2 summarize ten practically  
 93 relevant cases for which we obtained closed-form expressions, and we are certain that many  
 94 more are possible. For details on the derivation of all individual results (including two cases  
 95 for Laplace distributed noise), we refer to the *Supplementary Material*.

96 Given the marginalized likelihood function  $p(\mathcal{D} | \theta)$  and the prior  $p(\theta)$ , the posterior distri-  
 97 bution  $p(\theta | \mathcal{D})$  of the parameters of the mathematical model can be sampled using MCMC  
 98 and related methods. The sampling can be performed in the space of  $\theta$ , as the observation  
 99 parameters are implicitly considered (Figure 1C).

100 The samples of model parameters  $\theta$  from  $p(\theta | \mathcal{D})$  allow for the assessment of the model prop-  
 101 erties and its uncertainties. In this regard, there is no difference of sampling the marginal-  
 102 ized posterior distribution  $p(\theta | \mathcal{D})$  compared to projecting the full posterior distribution  
 103  $p(\theta, s, b, \sigma^2 | \mathcal{D})$  onto the  $\theta$  component. However, tasks like the assessment and plotting of

104 the model-data mismatch also require the posterior of the observation parameters. These  
 105 can be obtained by sampling from the conditional distribution  $p(s, b, \sigma^2 \mid \theta, \mathcal{D})$ . As the obser-  
 106 vation parameters only influence the observation model (1) and not the calculation of state  
 107  $x(t, \theta)$  and observable map  $h(x, \theta)$ , the conditional distribution can be expressed in closed-  
 108 form and sampled efficiently. For the aforementioned case, a matching sample of observation  
 109 parameters for a given model parameter  $\theta$  can be obtained by drawing from Gamma and  
 110 Normal distributions:

$$\begin{aligned} \sigma^2 &= 1/\lambda \quad \text{with} \quad \lambda \propto \Gamma\left(\alpha' = \alpha + \frac{n_t}{2}, \beta' = C\right), \\ b &\propto \mathcal{N}\left(\mu' = \frac{\kappa\mu + (\sum_{i=1}^{n_t} \bar{y}_i - h_i)}{\kappa + n_t}, \lambda' = \lambda(n_t + \kappa)\right), \text{ and} \\ s &\propto \mathcal{N}\left(\mu' = \frac{(\kappa + n_t)(\tau\nu + \sum_{i=1}^{n_t} h_i \bar{y}_i) - (\kappa\mu + \sum_{i=1}^{n_t} \bar{y}_i)(\sum_{i=1}^{n_t} h_i)}{(\kappa + n_t)(\tau + \sum_{i=1}^{n_t} h_i^2) - (\sum_{i=1}^{n_t} h_i)^2}, \right. \\ &\quad \left. \lambda' = \lambda\left(\tau + \sum_{i=1}^{n_t} h_i^2 - \frac{(\sum_{i=1}^{n_t} h_i)^2}{(n_t + \kappa)}\right)\right), \end{aligned}$$

111 with  $h_i$  and  $C$  being evaluated for model parameter  $\theta$ . This conditional sampling can be  
 112 proven to provide the same correlation structure as directly sampling the full posterior dis-  
 113 tribution. For details on the derivation of the conditional sampling for the observation  
 114 parameters we refer to the *Supplementary Material*. As the conditional sampling can be per-  
 115 formed independently and does not require model simulation, it is computationally efficient.  
 116 For additional observation models see Supplementary Tables S1- S2.

117 In summary, a broad spectrum of sampling problems occurring in scientific disciplines, such  
 118 as systems and computational biology, can be reformulated by performing an analytically  
 119 tractable marginalization of their observation parameters. Sampling of this lower dimensional  
 120 posterior distribution for the model parameters  $\theta$  in combination with conditional sampling  
 121 for the observation parameters allows the construction of samples from the full posterior  
 122 distribution. Accordingly, the original sampling problem is decomposed in two sub-problems,  
 123 of which the conditional sampling is optional.

## 124 **Marginalization-based approach yields same results at lower com-** 125 **putational cost**

126 To compare the performance for the standard and marginalization-based approach, we per-  
 127 formed a range of studies using (i) a simple test problem and (ii) published models and  
 128 datasets.

Table 1: **Key numbers and features of the considered toy and benchmark models.**

The number of unknown model parameters  $n_\theta$ , unknown scaling parameters  $n_s$ , unknown offset parameters  $n_b$  and unknown noise parameters  $n_\sigma$ , which are effectively sampled, are reported.

| Model ID                                                                                     | $n_\theta$ | $n_s$ | $n_b$ | $n_\sigma$ | Description              | Reference |
|----------------------------------------------------------------------------------------------|------------|-------|-------|------------|--------------------------|-----------|
| <b>Toy</b>  | 2          | 1     | 1     | 1          | Conversion reaction      | -         |
| <b>M1</b>   | 13         | 3     | -     | -          | EGF-AKT pathway          | [29]      |
| <b>M2</b>   | 6          | 3     | -     | 3          | STAT5 dimerization       | [30]      |
| <b>M3</b>   | 3          | 1     | -     | 1          | mRNA transfection        | [31]      |
| <b>M4</b>   | 26         | 31    | -     | -          | Gastric cancer signaling | [27]      |

129 As a simple test problem we considered a model of a conversion reaction process,  $A \rightleftharpoons B$ .  
 130 This process was considered in various other publications [28, 32] and can be described using  
 131 a two-dimensional system of ODEs, with the concentrations of  $A$  and  $B$  as state variables.  
 132 Here, we considered that the abundance of  $B$  is measured up to an unknown scaling, offset  
 133 and noise level. Accordingly, the mathematical model possesses two model parameters: the  
 134 forward rate  $A$  to  $B$ ,  $\theta_1$ , and the backward rate  $B$  to  $A$ ,  $\theta_2$ ; and three observation parameters:  
 135 the scaling  $s$ , the offset  $b$  and the noise variance  $\sigma^2$  (Table 1). A detailed description of the  
 136 model is provided in the *Methods* section.

137 In the first step, we used the model to assess the correctness of the analytical marginalized  
 138 likelihood (4) by comparing its agreement with numerical integration of (3). The results show  
 139 a perfect match for a range of different parameter values (Figure 2A). Yet, the evaluation of  
 140 the analytical marginalized likelihood was five orders of magnitude faster than the numerical  
 141 integration (Figure 2B), which highlights the importance of the analytical derivations. In  
 142 the second step, we performed 100 independent MCMC sampling runs for the standard and  
 143 marginalization-based approach. The runs employed a state-of-the-art adaptive Metropolis  
 144 Hasting method [18]. We found a superior performance of the marginalization-based ap-  
 145 proach, as the observed effective sample size per unit of time was twice as high as for the  
 146 standard approach (Figure 2C). This indicates that the marginalization-based approach fa-  
 147 cilitates already for simple problems the mixing of the MCMC chains and, hence, provides  
 148 a more efficient exploration of the posterior. Moreover, the model fit for the best sample  
 149 found (i.e. maximizing the posterior) coincided for both approaches (Figure 2D) as well as  
 150 the marginal distributions for the model parameters  $\theta_1$  and  $\theta_2$  (Figure 2E–F), and the con-  
 151 ditionally sampled observation parameters (Figure 2G–I).

152 Following the promising results for the test problem, we evaluated the performance of the  
 153 proposed marginalization-based approach for three already published models and datasets

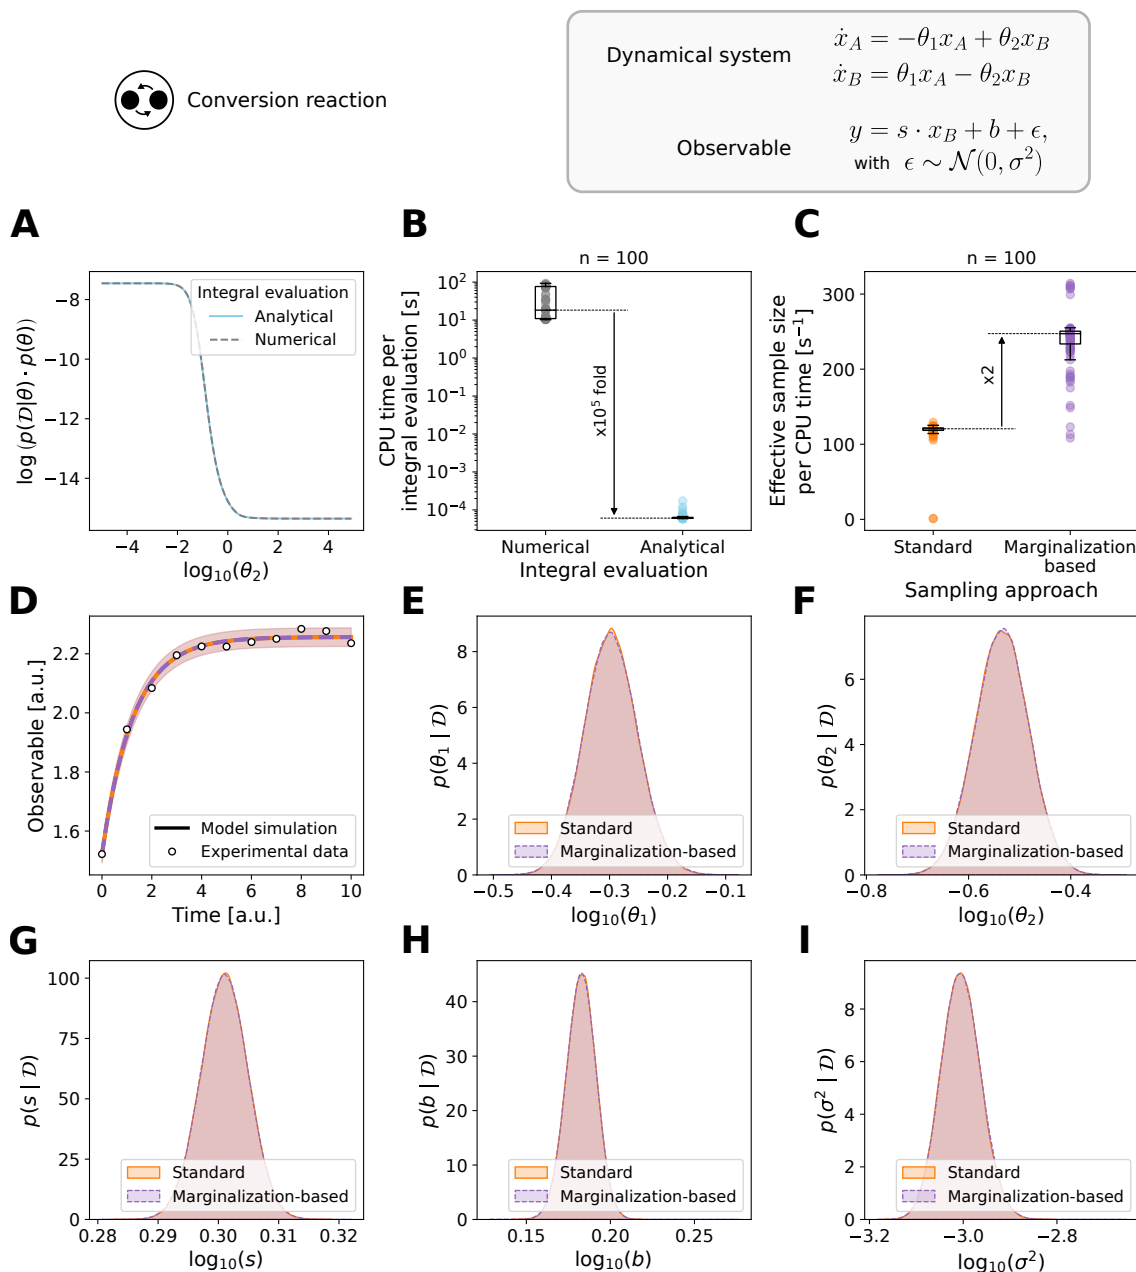

Figure 2: **Evaluation of the standard and marginalization-based approach for the toy model.** (A) Comparison of analytical vs. numerical integration. (B) Time comparison of analytical vs. numerical integration. (C) Effective sample size per unit of time for 100 independent runs. (D) Model fit of the best sample found during sampling from the standard (orange) and marginalization-based (purple) approach. (E–I) Parameter marginal posterior distributions computed using a kernel density estimate for the model parameters (E)  $\theta_1$  and (F)  $\theta_2$ , and the conditionally sampled observation parameters: (G) scaling factor  $s$ , (H) offset  $b$ , and (I) noise variance  $\sigma^2$ .

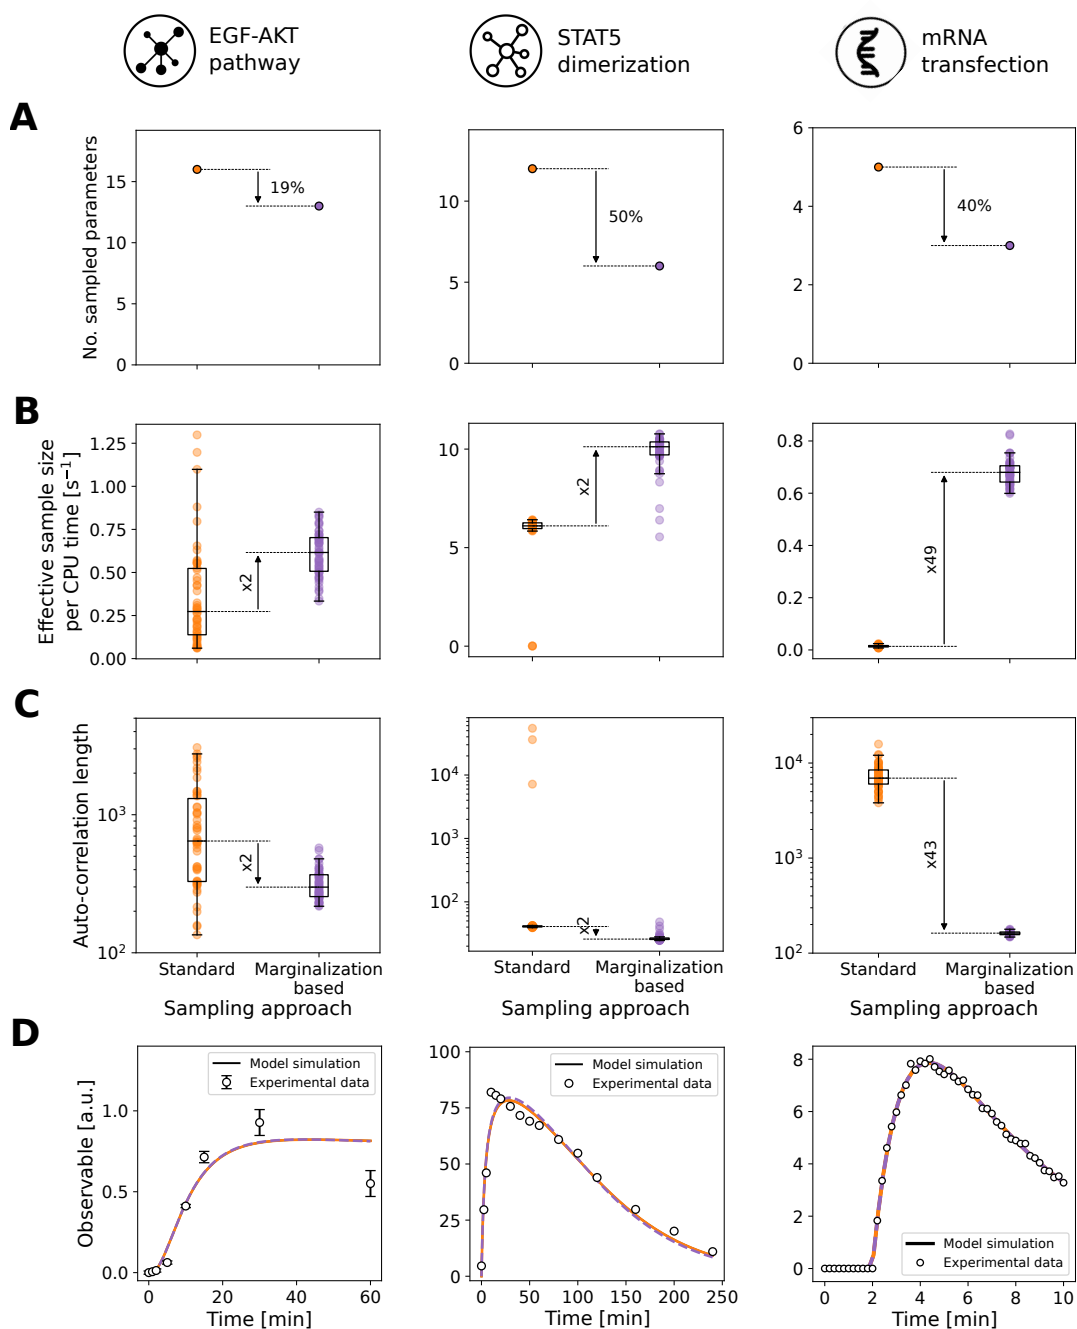

Figure 3: **Evaluation of the standard and marginalization-based approach for the benchmark models.** Models M1–M3 are shown from left to right. (A) Number of sampled parameters. (B) Effective sample size per unit of time. (C) Auto-correlation length. (D) Model fit of the best sample found during sampling. A subset of the experimental data is shown for M1 and M2. Complete datasets are depicted in Supplementary Figures S2 and S4.

154 (Table 1 and *Methods* section). The models M1 to M3 describe cellular processes: (M1) EGF-  
155 induced AKT signalling; (M2) phosphorylation-dependent STAT5 dimerization; and  
156 (M3) mRNA transfection. The numbers of model and observation parameters differ, and so  
157 do the observation functions. Accordingly, different closed-form expressions for the marginal-  
158 ized likelihood function are used (Supplementary Tables S1– S2). More importantly, the full  
159 posterior distributions exhibit different characteristics, ranging for instance from uni- to bi-  
160 modal.

161 For the considered application problems, the marginalization of the observation parameters  
162 reduced the dimensionality of the sampling problems by up to 50% (Figure 3A). To eval-  
163 uate the impact of this reduction on the sampling efficiency, we performed 50 independent  
164 MCMC sampling runs using the parallel tempering algorithm with 10 temperatures [21] af-  
165 ter assessing the correctness of the analytical marginalized likelihood for models M1–M3  
166 (Supplementary Figure S9). All the runs were initialized at the local optima found during  
167 multi-start optimization [12], and run for  $10^6$  iterations. Further details are provided in the  
168 *Methods* section. The high number of iterations allowed all MCMC runs of the standard and  
169 marginalized problem to converge according to the Geweke test [33]. Yet, the marginalization-  
170 based approach achieved a higher effective sample size per unit of computation time than  
171 the standard approach (Figure 3B). The improvement was problem dependent and ranged  
172 from 2 (M1 and M2) to nearly 50 (M3) times higher efficiency in the marginalization-based  
173 approach. As the computation time was similar, the core reasons for this is a reduction  
174 in the auto-correlation length (Figure 3C). The model fits for the best sample found were  
175 identical for both approaches (Figure 3D) as well as the parameter marginal distributions  
176 (Supplementary Figures S1, S3 and S5).

177 In summary, test and application problems demonstrates the acceleration potential of the  
178 marginalization-based approach. The improvement was problem specific, with no clear de-  
179 pendence on the degree of dimensionality reduction, but in all cases substantial.

## 180 **Marginalization-based approach improves transition rates between** 181 **posterior modes**

182 To understand for which problems the marginalization-based approach is expected to achieve  
183 a large acceleration, we considered the model M3. The posterior distribution for M3 is bi-  
184 modal and a simple explanation for the acceleration would have been that the bimodality  
185 is eliminated. Yet, this is not the case as the bimodality is related to a symmetry in model  
186 parameters. Numerical simulations as well as analytical results reveal that the observable tra-  
187 jectory remains unchanged when the mRNA and protein degradation rates are interchanged.  
188 As long as the optimal point is not located on the line of equal degradation rates, standard  
189 and marginalized posterior are bimodal.

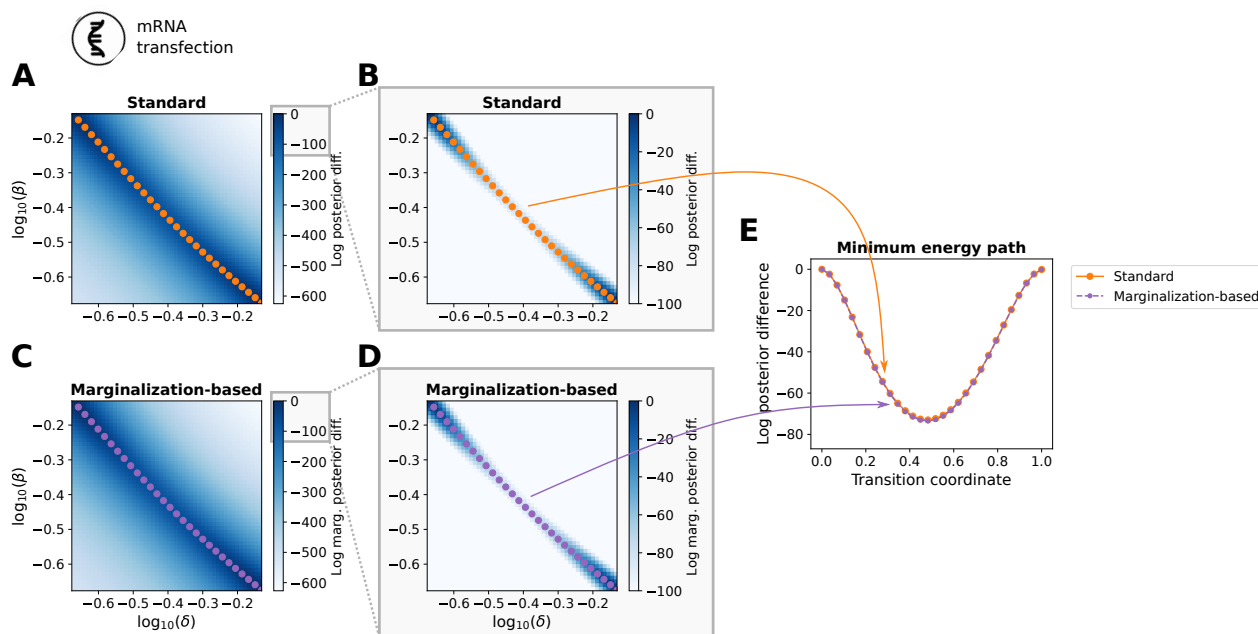

Figure 4: **Comparison of the minimum energy path for model M3.** Landscape of the optimized (A,B) posterior and (C,D) marginalized posterior for different fixed values of the model parameters  $\beta$  and  $\delta$ . The difference with respect to the maximal posterior value is depicted. (E) Transition coordinates for the minimum energy path.

190 We hypothesized that the large efficiency improvement is related to a lower minimum en-  
 191 ergy path for the transitions in the marginalized posterior. To assess this, we computed the  
 192 minimum energy paths [34] for the standard (Figure 4A,B) and marginalized posterior (Fig-  
 193 ure 4C,D) (see details in the *Methods* section). To our surprise, the minimum energy path  
 194 is almost identical for both approaches (Figure 4E). Hence, there is at least no difference in  
 195 the minimum energy path.

196 In order to understand the improvement observed for runs of adaptive parallel tempering  
 197 methods, we performed 10 runs of a single-chain adaptive Metropolis algorithm [18] with  $10^6$   
 198 iterations. This simplified the interpretation as it excludes the possibility of chain swaps. Yet,  
 199 we found that for the given number of iterations this single-chain algorithm does essentially  
 200 not transition between the modes (see  $T = 1$  in Figure 5A). To assess the relative complexity  
 201 of the sampling problem for standard and marginalization-based approach, we repeated the  
 202 evaluation for the tempered posterior. We found that the marginalization-based approach  
 203 allows already at lower temperatures for transitions between the modes unlike the standard  
 204 sampling approach (Figure 5A and Supplementary Figures S7–S8). For temperatures such  
 205 as  $T = 16$ , the standard approach showed an average number of only 5 transitions between  
 206 the modes with many runs only sampling from a single mode (Figure 5B,C), while for the  
 207 marginalization-based approach on average  $1.6 \times 10^4$  transitions occurred (Figure 5D,E). As



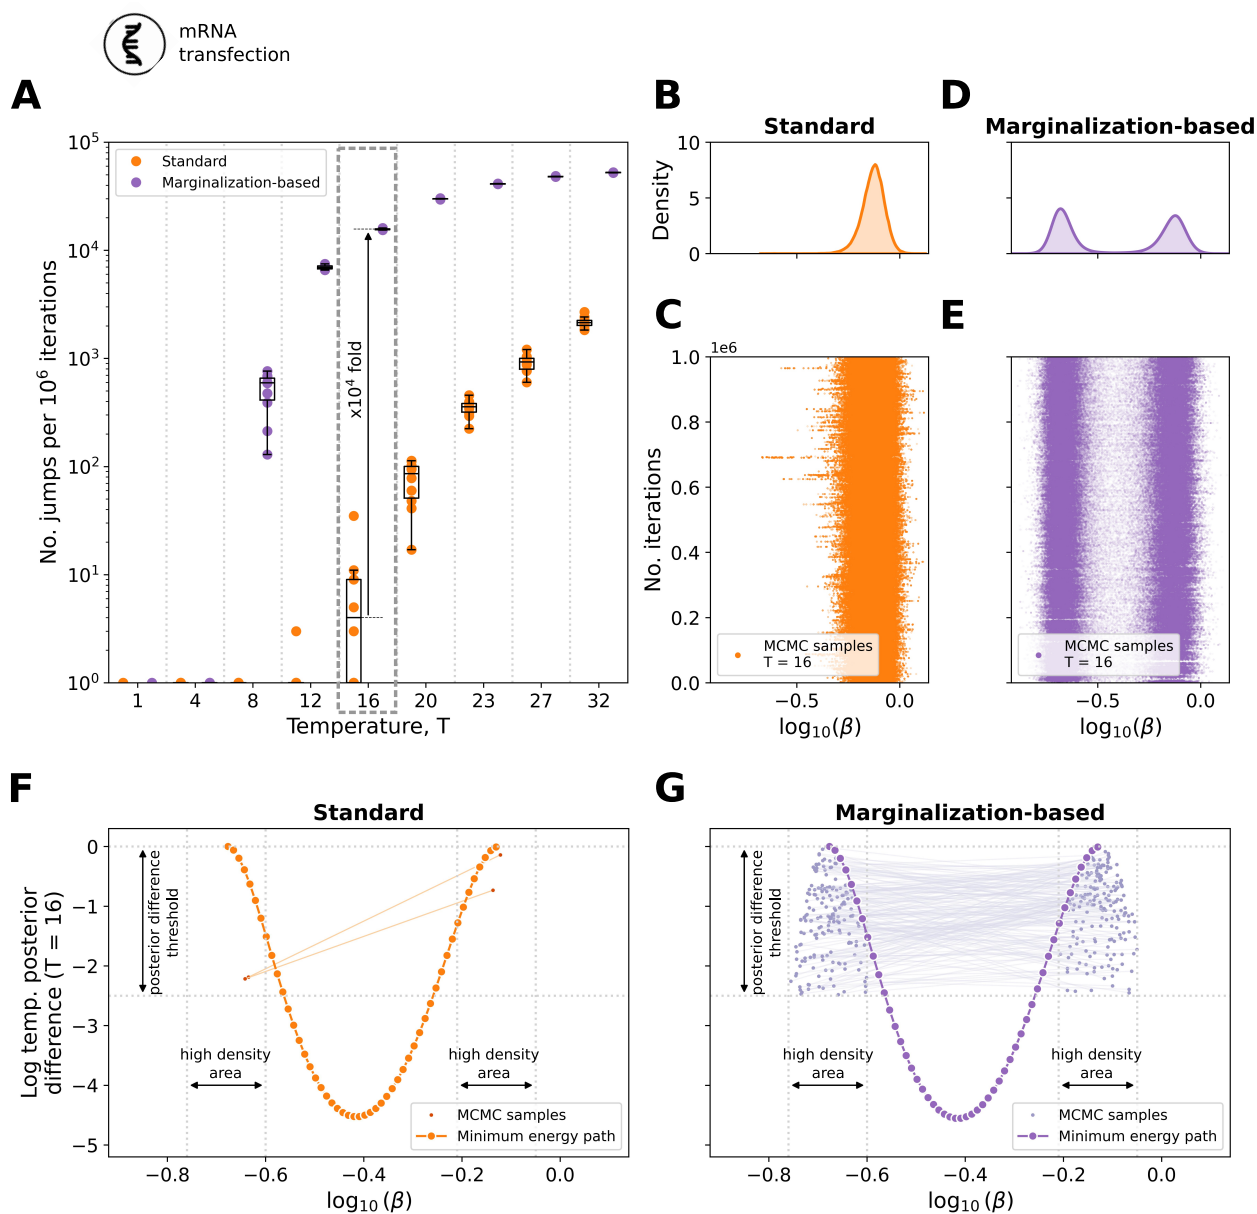

Figure 5: **Quantification of the transitions between the posterior modes for different temperatures  $T$  for model M3.** (A) Number of transitions per  $10^6$  iterations for a range of temperatures for the standard (orange) and marginalization-based (purple) approach. A total of 10 chains per temperature value are depicted. (B,D) Marginal distribution computed using a kernel density estimate and (C,E) parameter trace for the model parameter  $\beta$  of a representative chain obtained with the (B,C) standard and (D,E) marginalization-based approach for  $T = 16$ . (F,G) Direct transitions between the posterior modes of a representative chain along with the minimum energy path obtained with the (F) standard and (G) marginalization-based approach for  $T = 16$ .

208 the minimum barrier energy is conserved also for higher temperatures (Supplementary Fig-  
209 ure S6), this increase in the transition rate by four orders of magnitude for the algorithm  
210 implies a lower overall complexity of the marginalization-based sampling problem.

211 As the increased transition rate is not caused by an altered energy path, we studied the  
212 transition paths. This revealed that the employed single-chain algorithm facilitates jumps  
213 over the valley in the objective function (Figure 5F,G), meaning that it transitions between  
214 high-probability regions around the local optima. These direct transitions appear at a high  
215 rate for the marginalization-based approach (Figure 5G), while they rarely happen for the  
216 standard approach (Figure 5F). For the latter, most transitions are along low-energy paths  
217 with posterior probabilities dropping below the minimum energy path. Accordingly, the  
218 transition behaviour is for the marginalization-based approach more efficient than for the  
219 standard approach.

220 In summary, the in-depth study of the mRNA transfection model (M3) showed that the  
221 marginalization-based approach can achieve substantial accelerations as the structure of the  
222 sampling problem is simplified, e.g. by facilitating transitions between modes. The improve-  
223 ments are related to the interplay of sampling approach and problem geometry. In particular  
224 for challenging (e.g. multi-modal) problems a much greater improvement could be observed.

## 225 **Marginalization-based approach enables Bayesian inference for large** 226 **models**

227 As the marginalization-based approach appeared beneficial for challenging problems, we as-  
228 sessed in a next step whether it enables Bayesian inference for problems for which standard  
229 approaches did not provide reproducible results in a reasonable time-frame. Specifically, we  
230 considered an ODE model for signal transduction in gastric cancer cells (cell line MKN1)  
231 that was developed to unravel response and resistance markers [27]. This model possesses  
232 in total 57 unknown parameters, of which 26 are model parameters and 31 are observation  
233 parameters (Table 1, M4).

234 The application of the marginalization-based approach resulted in a reduction of the dimen-  
235 sionality of the sampling problem by over 50% (Figure 6A). For the 26 model parameters  
236 which remain to be sampled, we compared the marginal likelihoods as computed using the  
237 previously derived analytical formulas and numerical integration (Figure 6B). The agree-  
238 ment of the results (Pearson correlation  $r \approx 1.0$ ) confirmed the correctness of our analytical  
239 integration.

240 To determine the parameters of the model, we performed sampling using standard and  
241 marginalization-based approach. The adaptive Metropolis-Hastings algorithm [18] and the  
242 adaptive parallel tempering algorithm [21] employed in the previous sections were run 10

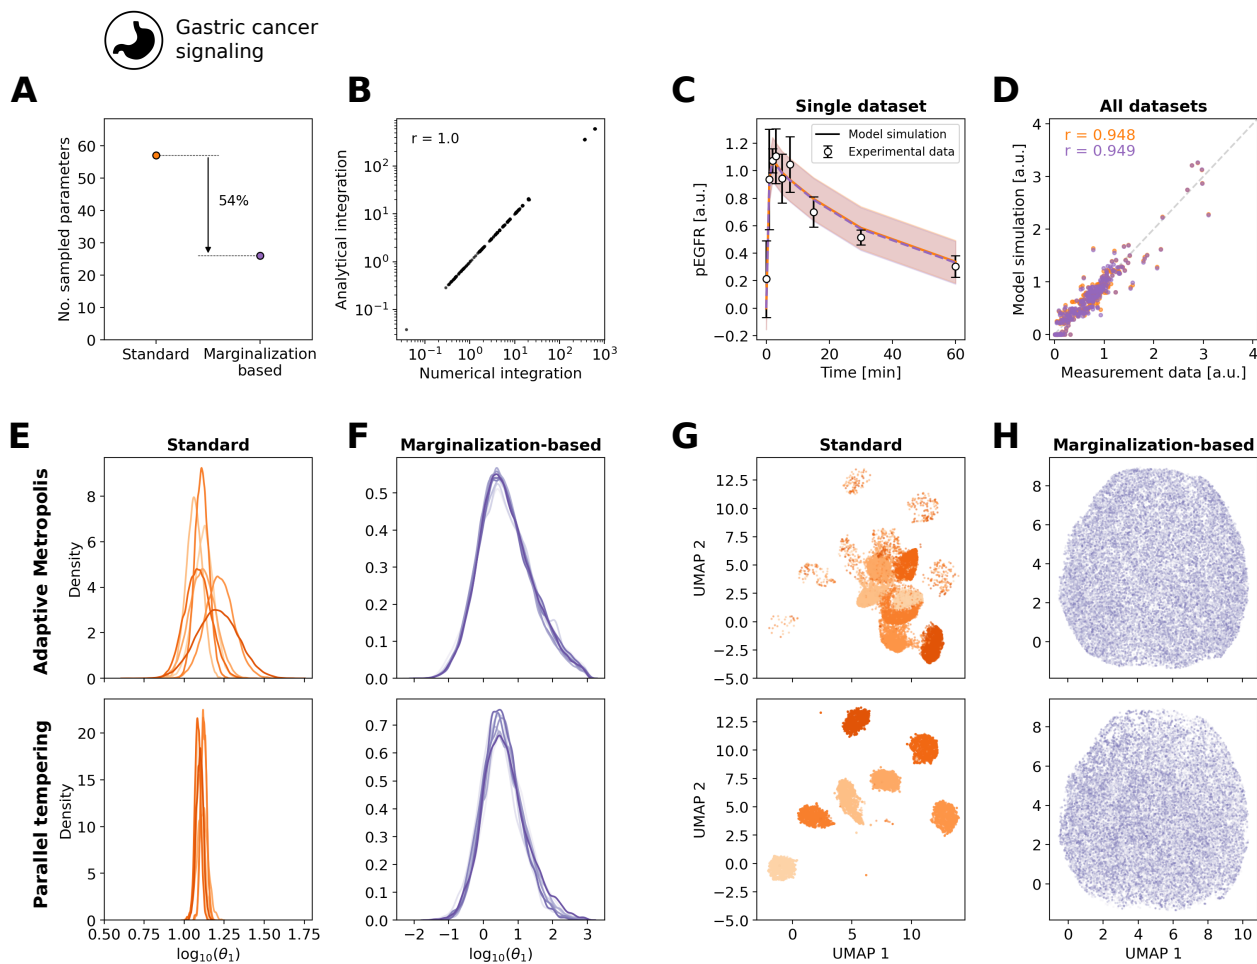

Figure 6: **Convergence of the marginalization-based approach for model M4.** (A) Number of sampled parameters. (B) Scatter plot for the agreement of analytical and numerical integration. (C,D) Model fit of the best sample found during sampling for, (C) a subset of the experimental data and (D) the complete dataset in form of a scatter plot, the standard (orange) and marginalization-based approach (purple). (E–H) Results from adaptive Metropolis (top) and parallel tempering (bottom) are shown. (E,F) Parameter marginal posterior distribution obtained using the (E) standard and (F) marginalization-based approach computed using a kernel density estimate for model parameter  $\theta_1$ . (G,H) Dimensionality reduction for all samples from all runs for the (G) standard and (H) marginalization-based approach using the UMAP representation. Different shades correspond to individual runs. The UMAPs were constructed using the Python package `umap` [35].

243 times with different starting points and random seeds for  $10^6$  iterations for the adaptive  
 244 Metropolis-Hastings and  $10^5$  iterations for the adaptive parallel tempering algorithm. The  
 245 maximum a posteriori estimates observed in the different runs provided similar fits (Fig-  
 246 ure 6C,D). In contrast, the marginal distributions of the model parameters differed, with the

247 marginalization-based approach mostly providing broader parameter distributions than the  
248 standard approach (Figure 6E,F). The assessment of the reproducibility of the marginal dis-  
249 tributions revealed a high variability between different runs performed using the standard ap-  
250 proach (Figure 6E and Supplementary Figure S10). On the contrary, for the marginalization-  
251 based approach a good agreement between runs was observed (Figure 6F and Supplemen-  
252 tary Figure S11), indicating reproducibility. To verify that the behavior observed for the  
253 individual parameters is maintained in the full parameter space, we analyzed the overall  
254 agreement of all parameter samples across all runs for the standard and marginalization-  
255 based approach by visualizing the samples using the uniform manifold approximation and  
256 projection (UMAP) representation [35]. We found that the individual runs of the standard  
257 approach represent individual clusters in the UMAP (Figure 6G), while the individual runs of  
258 the marginalization-based approach were indistinguishable (Figure 6H). This revealed that:  
259 (i) in the marginalization-based approach all the individual runs sample from the same dis-  
260 tribution, and (ii) the standard approach failed for both algorithms considered here.

261 The study of the model of signal processing in gastric cancer cells revealed that marginalization-  
262 based approach allows for reproducible sampling in problems, where the standard approach  
263 failed. While for the marginalization-based approach all runs provided consistent results, the  
264 standard approach failed to converge within an average CPU time of 150 hours rendering  
265 its application impracticable. Furthermore, our study provides improved estimates for the  
266 parameters (Supplementary Figure S12) of important processes of a drug used in clinical  
267 practice.

268 In summary, the application of our marginalization-based approach to Bayesian inference for  
269 models with relative measurement data shows consistently that our approach yields the same  
270 marginal distributions for the parameters as the standard approach, while being highly more  
271 efficient in exploring the parameter space and enabling Bayesian inference of larger models,  
272 which was not possible before with the standard approach.

## 273 Discussion

274 Bayesian inference for models of biological processes requires the consideration of parame-  
275 ters of the dynamical systems as well as the measurement process. The unknown scaling  
276 factors, offsets and noise levels often resemble large fraction of the overall parameters [12].  
277 This complicates sampling and can render the generation of representative samples practi-  
278 cally infeasible. Here, we address this challenge by introducing a framework which employs  
279 (analytical) marginalization. This approach allows for the construction of a sample from the  
280 full posterior by (i) sampling a marginalized posterior for the parameters of the dynamical  
281 systems and (ii) conditional sampling of the observation parameters.

282 We evaluated the performance of our marginalization-based approach and compared it to  
283 the standard approach for four published models, with differences in their complexity. This  
284 revealed an increased effective sample size per unit of time, and increased transition proba-  
285 bilities between posterior modes. The marginalization-based approach was for all considered  
286 problems more efficient than the standard approach, but – more importantly – it also en-  
287 abled the assessment of the posterior distribution for larger models for which the standard  
288 approach failed to converge in the considered time-frame. Interestingly, there was no strong  
289 relation between the reduction of the problem dimensionality and the improvement in ef-  
290 ficiency. This is consistent with previous finding for hierarchical optimization [25]. Based  
291 on our observations we expect the sampling behavior to benefit substantially even from the  
292 removal of a small number of parameters, as (i) the likelihood value is often very sensitive  
293 to them, which produces narrow rims in the posterior distribution, and as (ii) the removal  
294 of a small number of parameters can result in a substantially increased probability to jump  
295 between modes. The latter was observed for the model of mRNA transfection.

296 The approach presented here is not limited to relative measurement data, but also applicable  
297 to absolute measurements. As for these, the noise parameters would still have to be inferred  
298 (Supplementary Tables S1 and S2). We provide the detailed derivation in the *Supplementary*  
299 *Material*. Accordingly, our approach can be used for combinations of relative and absolute  
300 data. Also, it is applicable to different measurement process functions and noise models  
301 to the ones considered here. We hypothesize that also an extension to correlated noise is  
302 possible, but this remains to be assessed.

303 The choice of conjugate priors for the marginalized parameters eased the analytical derivation  
304 of the marginal posterior. This implies in our case that observable and noise parameters  
305 are not independent under the prior. Mostly, this is not a problem since both parameters  
306 are related to the measurement process. However, in some cases, there might be known  
307 to be independent, therefore other prior distribution assumptions must be considered. It  
308 should be noted that the concept of marginalization is not restricted to integrals that are  
309 analytically solvable, but also numerical integration schemes can be considered. However,  
310 this would increase the required computation time (as observed in Figure 2B), but very likely  
311 the improved mixing properties would be maintained.

312 The proposed method was beneficial in combination with adaptive Metropolis-Hastings and  
313 adaptive parallel tempering algorithms. We expect that the same will hold true for sampling  
314 algorithms exploiting gradient information, such as Hamilton Monte Carlo sampling [19, 20].  
315 As the marginal likelihood is differentiable, merely the derivation and implementation of  
316 the gradient is required. The usage of methods which exploit the Riemann geometry of  
317 the parameter space of statistical models, e.g., Metropolis-adjusted Langevin algorithm [36],  
318 might be slightly more involved. This requires the derivation of the marginalized Fisher  
319 information matrix. While we assume that this can be derived in closed-form or at least

320 be accurately approximated, the corresponding results are not yet available. Alternatively,  
321 automatic differentiation could be employed to obtain gradients [37].

322 In this study, we focused on the assessment of parameter uncertainties for ODE models. Yet,  
323 as the marginalization-based approach provides a complete parameter sample, it facilitates  
324 also the evaluation of prediction uncertainties [16]. Accordingly, we expect that it might  
325 contribute to resolving reliability problems of Bayes prediction uncertainty analysis encoun-  
326 tered in recent studies [38]. Furthermore, the proposed approach is not limited to ODEs,  
327 but directly applicable for other deterministic models, e.g. partial differential equations. As  
328 well, the idea might be incorporated in likelihood-free inference schemes used for stochastic  
329 and multi-scale models [39, 40]. Among other things, it might be used in exact Approximate  
330 Bayesian Computation schemes [41] by reformulating the acceptance probability.

331 In summary, the marginalization-based approach provides a new tool for Bayesian inference  
332 for models with observation-related parameters. It substantially benefits the efficiency of  
333 sampling-based approaches, and renders the generation of representative posterior samples  
334 for large models possible. As it is agnostic to the structure of the underlying dynamical  
335 model, it is widely applicable to mathematical models from different research fields, such as  
336 engineering, physics and ecology.

## 337 **Methods**

### 338 **Mechanistic modeling of biological systems**

339 We consider models based on ODEs of the form

$$\dot{x}(t, \theta) = f(x(t, \theta), \theta), \quad x(t_0, \theta) = x_0(\theta),$$

340 in which the vector field  $f : \mathbb{R}^{n_x} \times \mathbb{R}^{n_\theta} \rightarrow \mathbb{R}^{n_x}$  determines the temporal evolution of the states  
341  $x(t, \theta) \in \mathbb{R}^{n_x}$ . The unknown model parameters, which are estimated from the measurements,  
342 are denoted by  $\theta \in \mathbb{R}^{n_\theta}$ . Usually,  $\theta$  includes reaction rate constants and initial amounts of  
343 species. Here,  $n_x$  is the total number of modeled species, and  $n_\theta$  the total number of model  
344 parameters. The states  $x(t, \theta)$  and model parameters  $\theta$  are linked to the observables via  
345 the observation map  $h : \mathbb{R}^{n_x} \times \mathbb{R}^{n_\theta} \rightarrow \mathbb{R}^{n_y}$ , where  $n_y$  is the total number of observables.  
346 The observables are the measured properties of the model. Most measurement techniques  
347 only provide relative information about the absolute concentrations of interest [8, 9] and,  
348 frequently, measurements are noise corrupted. Hence, to obtain the measurements  $\bar{y}$  (i) the  
349 model observables must be rescaled by introducing scaling factors and offsets, and (ii) the  
350 model also must capture experimental errors by defining a noise model. Most commonly,



351 independent and additive Gaussian distributed noise models are assumed

$$\bar{y}_{j,i} = s_{j,i} \cdot h_j(x(t_i, \theta), \theta) + b_{j,i} + \varepsilon_{j,i}, \quad \text{with } \varepsilon_{j,i} \sim \mathcal{N}(0, \sigma_{j,i}^2), \quad (5)$$

352 with observable index  $j$ , time index  $i$ , scaling factors  $s \in \mathbb{R}^{n_y \times n_t}$ , offsets  $b \in \mathbb{R}^{n_y \times n_t}$ , and noise  
353 parameters  $\sigma \in \mathbb{R}^{n_y \times n_t}$ . Here,  $n_t$  denotes the total number of time points. These parameters  
354 are often unknown and, therefore, also need to be estimated along with the unknown model  
355 parameters. Other usual noise assumptions include log-normal distributed noise models [11]  
356 and Laplace distributed noise models [28]. In this study, we focus on the case of additive  
357 Gaussian noise (5), but implementations for log-normal and Laplace distributed noise models  
358 are provided in Supplementary Tables S1–S2 and *Supplementary Material*.

359 We denoted the group of all measurements as  $\mathcal{D} = \{\bar{y}_{j,i}\}_{i=(1,\dots,n_t)}^{j=(1,\dots,n_y)}$ .

## 360 **Benchmark models**

361 For the evaluation of the marginalization-based approach, we employed in total five models  
362 (one toy model and four published M1–M4) and their corresponding datasets (Table 1).

### 363 **Toy: Model of a conversion reaction**

364 The conversion reaction model was introduced in [28] and describes a reversible chemical  
365 reaction, which converts a biochemical species  $A$  to a species  $B$  with rate  $\theta_1$ , and  $B$  to  $A$   
366 with rate  $\theta_2$  (Figure 2). We modified the observation model to include scaling and offsets. For  
367 the evaluation of the proposed method, we generated one artificial dataset which is depicted  
368 in Figure 2D. For details on the model structure and synthetic data generation we refer to  
369 the Supplementary Material.

### 370 **M1: Model of EGF-dependent AKT pathway**

371 The model of EGF-dependent AKT pathway has been introduced in [29] and possesses in  
372 total 16 unknown parameters: 13 model parameters and 3 scaling factors (Table 1, M1).  
373 The available experimental data are a total of 144 data points under 6 different experimental  
374 conditions for 3 observables. For each data point, the corresponding variance of the measure-  
375 ment noise is provided, therefore it does not need to be estimated. The complete dataset is  
376 depicted in Supplementary Figure S2.



## 377 **M2: Model of STAT5 dimerization**

378 The model of STAT5 dimerization has been introduced in [30] and possesses in total 9  
379 unknown parameters: 6 model parameters and 3 noise parameters. To this model, we have  
380 added 3 scaling factors (Table 1, M2), one per observable, for the sake of testing the proposed  
381 method. The available experimental data are a total of 48 data points for 3 observables. The  
382 complete dataset is depicted in Supplementary Figure S4.

## 383 **M3: Model of mRNA transfection**

384 The model for mRNA transfection has been introduced in [31] and possesses in total 5  
385 unknown parameters: 3 model parameters, 1 scaling factor, and 1 noise parameter (Table 1,  
386 M3). The complete dataset is depicted in Figure 3D. For further details of the model structure  
387 we refer to the Supplementary Material.

## 388 **M4: Model of gastric cancer signaling**

389 The model for gastric cancer signalling has been introduced in [27]. Here, we considered the  
390 Cetuximab responder cell line MKN1. The available experimental data for the responder  
391 cell line were a total of 303 data points under 106 different experimental conditions for 31  
392 observables. For each data point, the corresponding variance of the measurement noise was  
393 provided, therefore it did not need to be estimated.

## 394 **Parameter optimization**

395 To determine the maximum a posteriori (MAP) estimates, we minimized the negative log-  
396 posterior function. This minimization was performed using multi-start local optimization,  
397 an approach which was previously shown to be reliable [12, 42]. For local optimization, we  
398 used the trust-region optimizer `fides` [43]. Parameters were  $\log_{10}$ -transformed to improve  
399 numerical properties [42, 44, 45]. We generated 100 starting points for local optimization,  
400 except for model M4 for which we used 500 starting points.

## 401 **Bayesian parameter inference**

402 To perform Bayesian parameter inference, we used MCMC sampling following the pipeline  
403 presented in [46]. The MAP estimates were used to initialize the MCMC chains [46]:  
404 the full optimal vector  $(\theta, s, b, \sigma^2)^*$  to initialize the standard approach runs, while for the  
405 marginalization-based approach runs the corresponding subset  $\theta^*$  from  $(\theta, s, b, \sigma^2)^*$  was used.

406 The parameter posterior distribution was sampled using the adaptive Metropolis [18] and  
407 parallel tempering [47, 48] algorithms implemented in the Python toolbox pyPESTO [49].  
408 For the parallel tempering algorithm, we used 10 chains initialized at the 10 best local optima  
409 found during multi-start optimization for both approaches.

Convergence after burn-in was assessed using the Geweke test [33] and auto-correlation length using Sokal’s adaptive truncated periodogram-estimator [50], both also available under pyPESTO. The effective sample size is given by

$$n_{\text{eff}} = \frac{n}{1 + 2 \sum_{\tau=1}^{\infty} \rho_{\tau}}$$

410 where  $n$  is the number of samples remaining after discarding burn-in period, and  $\rho_{\tau}$  is the  
411 estimated auto-correlation at lag  $\tau$ .

412 For all models, the prior hyperparameters for both sampling approaches were the same as  
413 used for optimization.

#### 414 **Tempering scheme for the posterior analysis**

415 The posterior for standard and marginalization-based approach were tempered to assess  
416 transition characteristics (Figure 5). We used the tempered posteriors

$$p_T(\theta, s, \sigma^2 | \mathcal{D}) \propto (p(\mathcal{D} | \theta, s, \sigma^2)p(\theta)p(s, \sigma^2))^{1/T}.$$

417 and

$$p_T(\theta | \mathcal{D}) \propto (p(\mathcal{D} | \theta)p(\theta))^{1/T}.$$

418 with temperature  $T$ .

#### 419 **Implementation and data availability**

420 Models M1, M2 and M4 were taken from the PEtab benchmark collection [51] which is based  
421 on [44] and available at <https://github.com/Benchmarking-Initiative/Benchmark-Models-PEtab>. As model M3 is analytically solvable, we implemented the solution in Python code.  
422 For ODE integration (models M1, M2 and M4) we used the Python toolbox AMICI [52]. For  
423 optimization and sampling, we used the Python toolbox pyPESTO [49]. pyPESTO already  
424 offers an interface to the fides optimizer [43]. For the UMAP visualizations and the mini-  
425 mum energy path calculation, we used respectively the Python packages umap [35] and mep  
426 <https://github.com/chc273/mep>.

428 All code and models used in this study are available from the Zenodo database at <https://doi.org/10.5281/zenodo.7199473>.

## 430 **Acknowledgements**

431 This work was supported by the German Federal Ministry of Education and Research  
432 (Grant no. 031L0159C; J.H.), the University of Bonn (via the Schlegel Professorship; J.H.),  
433 the Deutsche Forschungsgemeinschaft (DFG, German Research Foundation) under Germany's  
434 Excellence Strategy EXC 2047/1 - 390685813 (E.R., M.F., J.H); EXC 2151 - 390873048 (E.R.,  
435 J.H.); TRR 333/1 - 450149205 (E.R., J.H.); SFB 1454 - 432325352 (M.F.); and 443187771  
436 (J.H.).

## 437 **Author contributions**

438 Conceptualization: J.H., E.R.; Methodology: J.H., E.R., M.F.; Software: E.R.; Formal  
439 analysis: E.R.; Investigation E.R., M.F.; Data curation: E.R.; Writing – original draft: J.H.,  
440 E.R.; Writing – review and editing: all authors; Visualization: E.R.; Supervision: J.H., E.R.;  
441 Funding acquisition: J.H.

## 442 **Competing interests**

443 The authors declare no competing interests.

## 444 Supplementary Figures and Tables

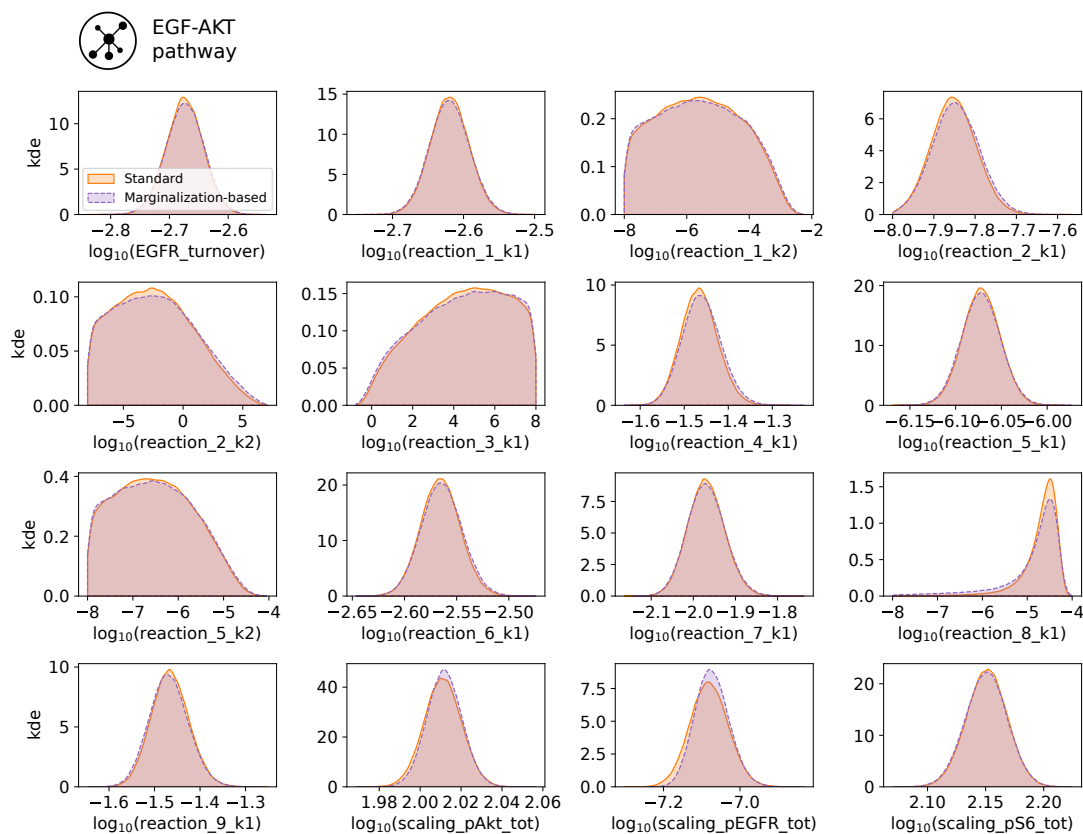

Figure S1: **Parameter marginal posterior distributions computed using a kernel density estimate for model M1.** The marginalized parameters, which are conditionally sampled, correspond to those denoted with *scaling*\*

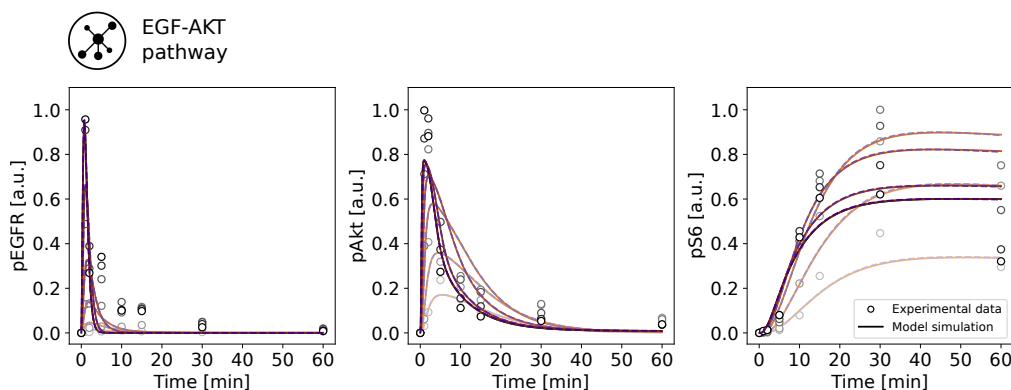

Figure S2: **Complete dataset and model fit for model M1.** Model simulation of the best sample found for the standard approach is depicted in orange and for the marginalization-based approach in purple. Different shades indicate different experimental conditions.

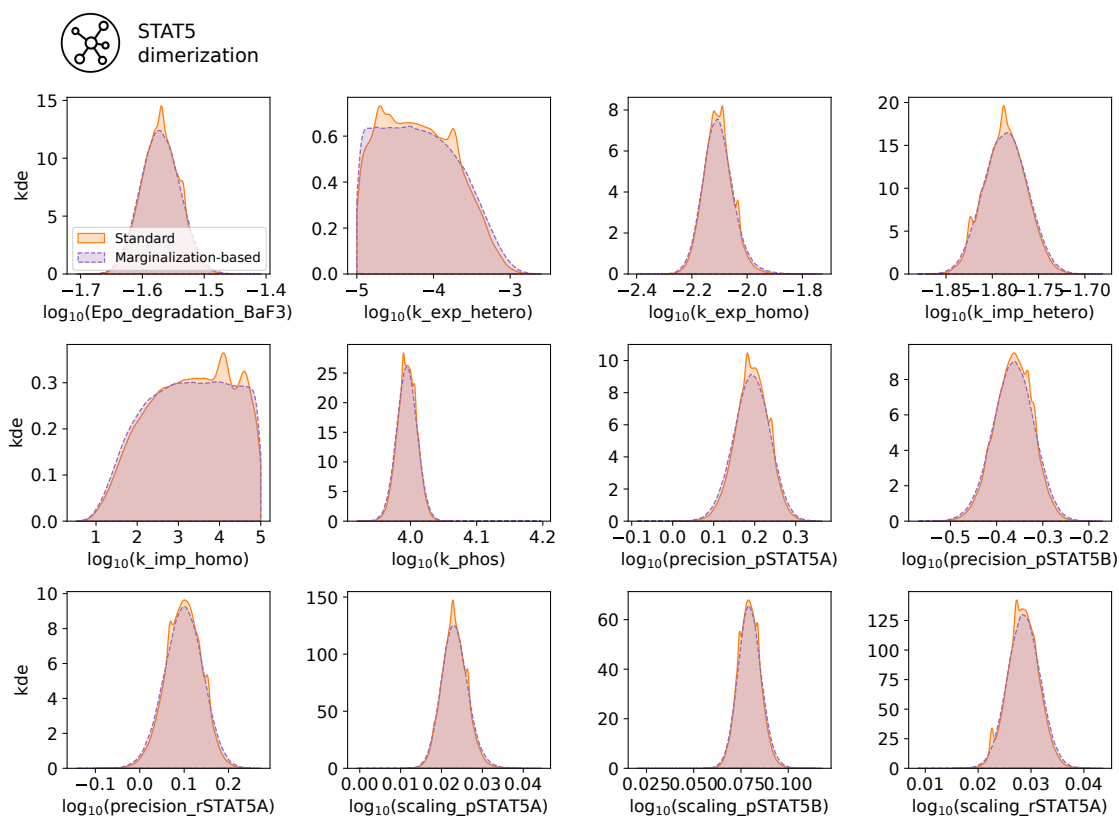

Figure S3: **Parameter marginal posterior distributions computed using a kernel density estimate for model M2.** The marginalized parameters, which are conditionally sampled, correspond to those denoted with *scaling\_\** and *precision\_\**.

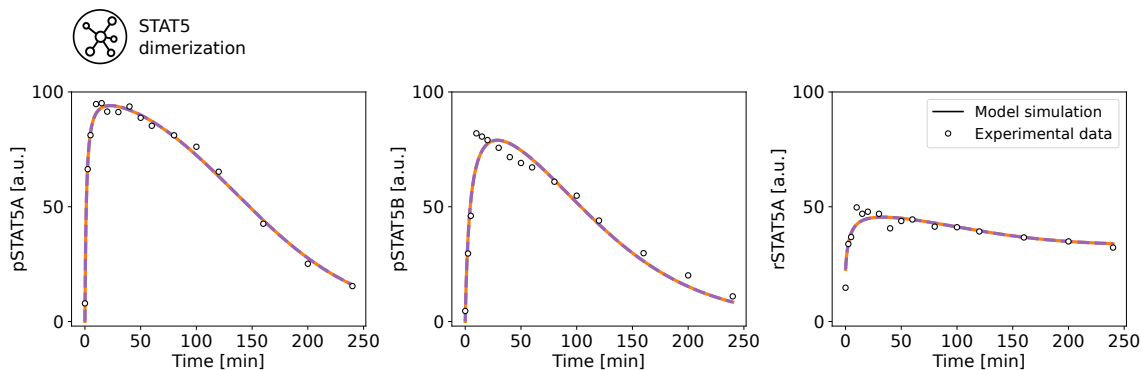

Figure S4: **Complete dataset and model fit for model M2.** Model simulation of the best sample found for the standard approach is depicted in orange and for the marginalization-based approach in purple.

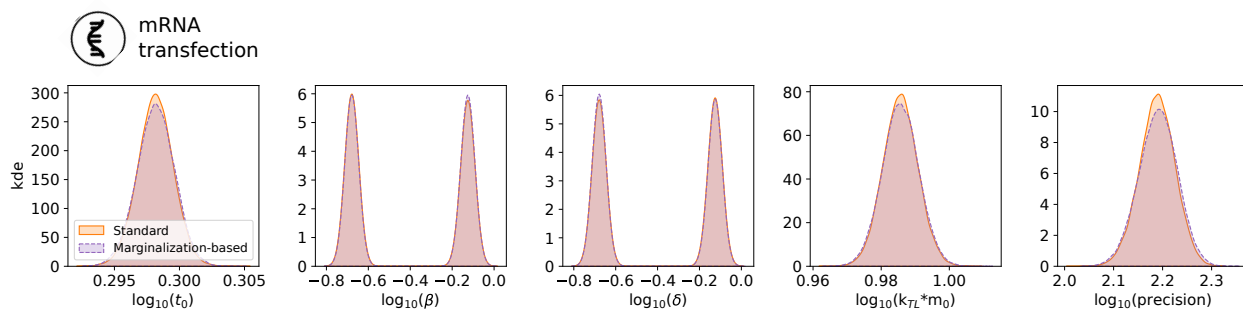

Figure S5: **Parameter marginal posterior distributions computed using a kernel density estimate for model M3.** The marginalized parameters, which are conditionally sampled, correspond to  $k_{TL} * m_0$  and *precision*.

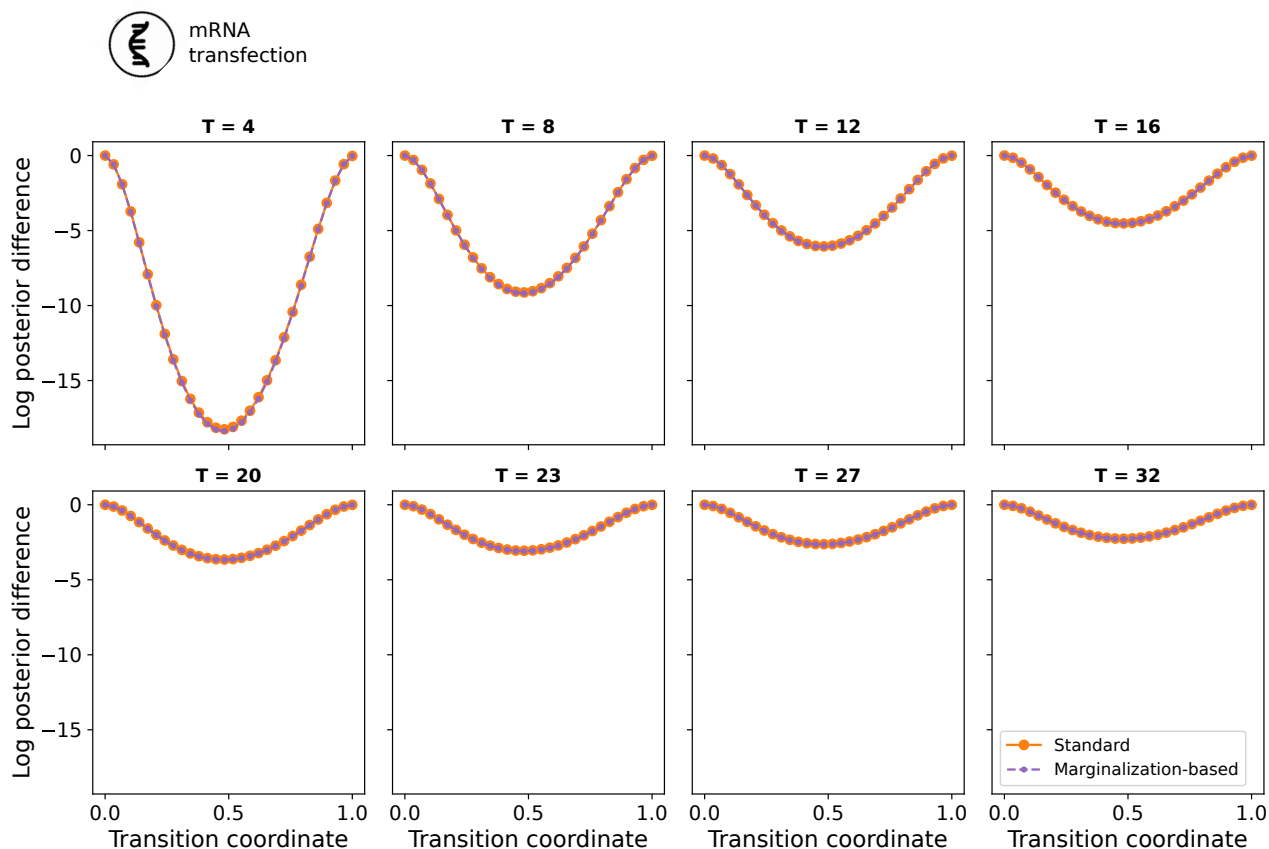

Figure S6: **Minimum energy path of the tempered posteriors for a range of temperatures considered in Figure 5A for model M3.**

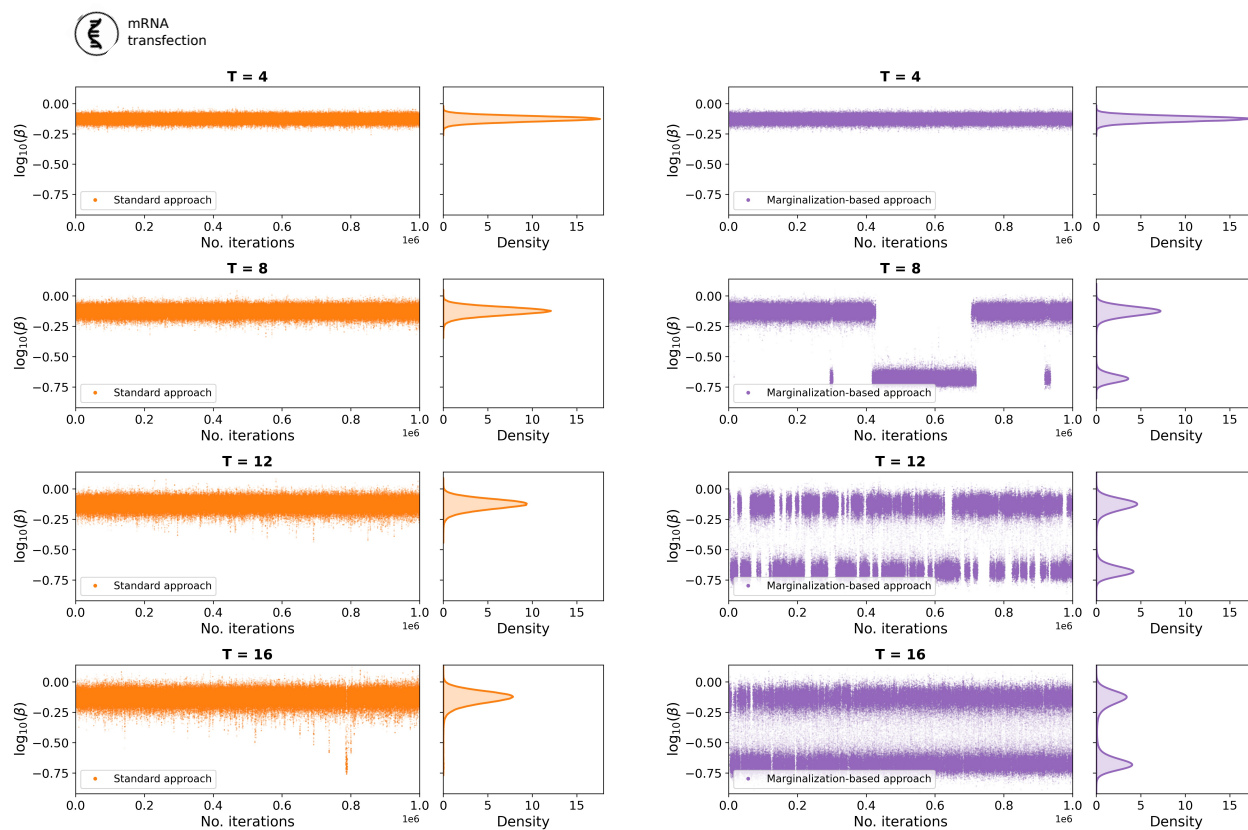

Figure S7: Representative parameter traces for the model parameter  $\beta$  for a range of temperatures considered in Figure 5A for model M3.



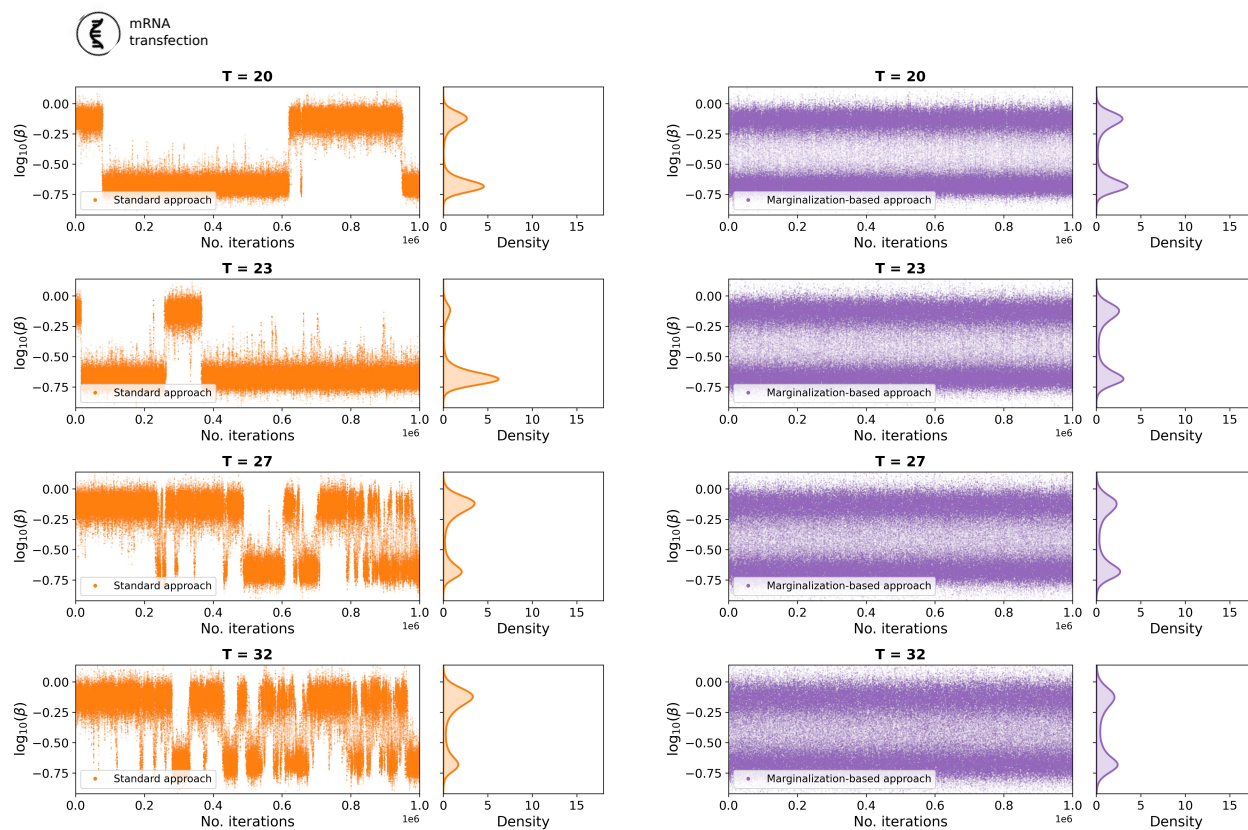

Figure S8: Representative parameter traces for the model parameter  $\beta$  for a range of temperatures considered in Figure 5A for model M3.

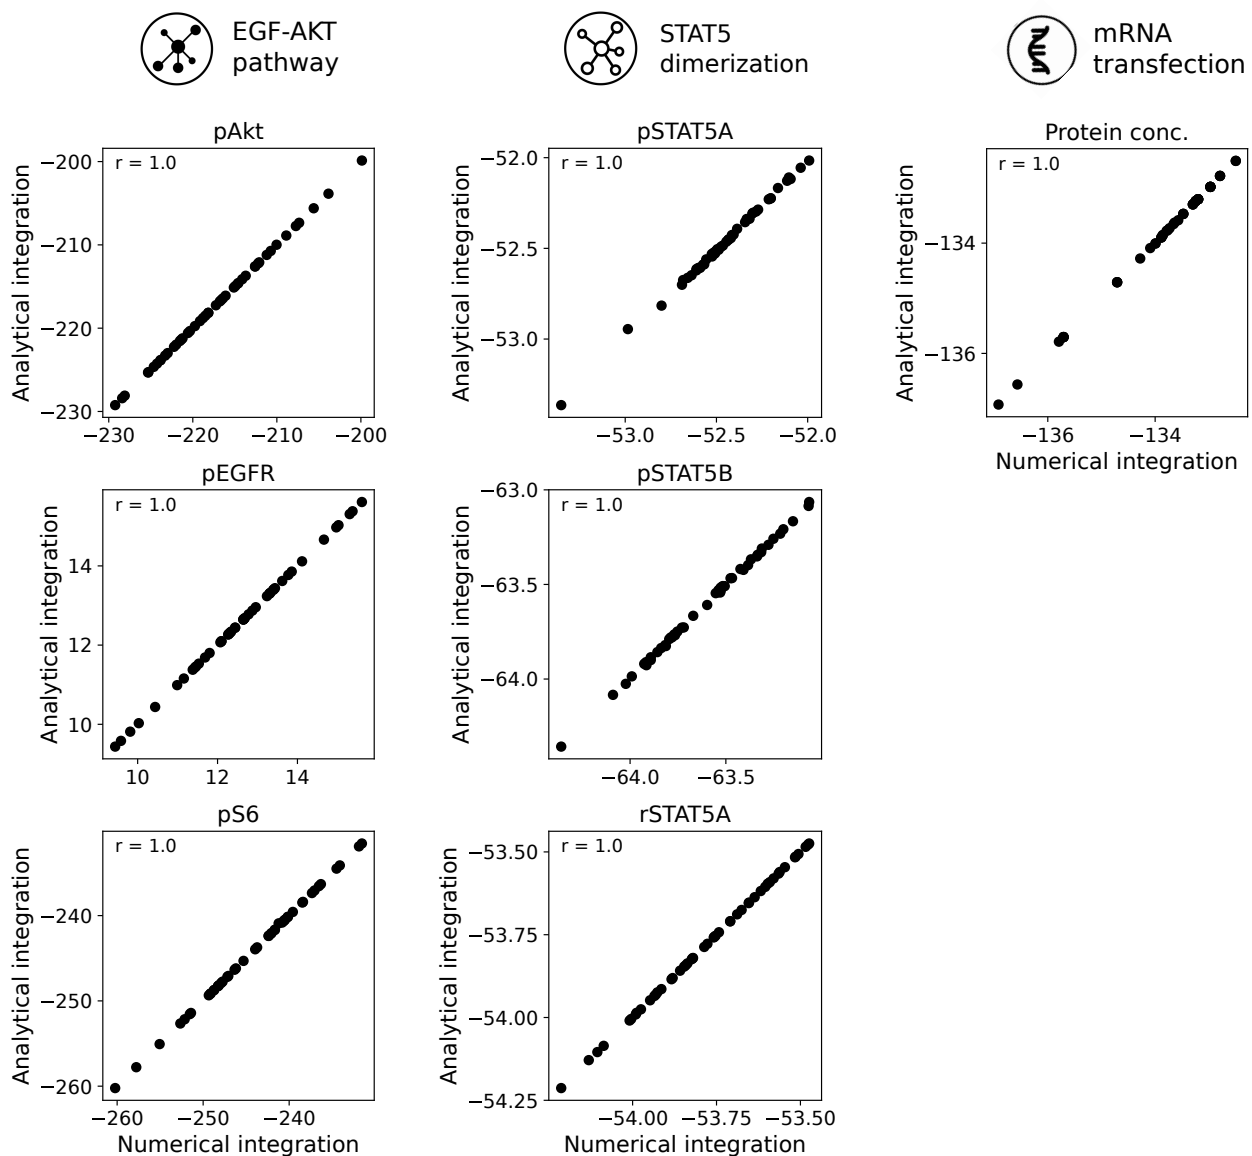

Figure S9: **Correctness of the analytical integration for model M1, M2 and M3.** Scatter plot for the agreement of analytical and numerical integration for 50 different parameter vectors. The integration results are shown for each model observable.

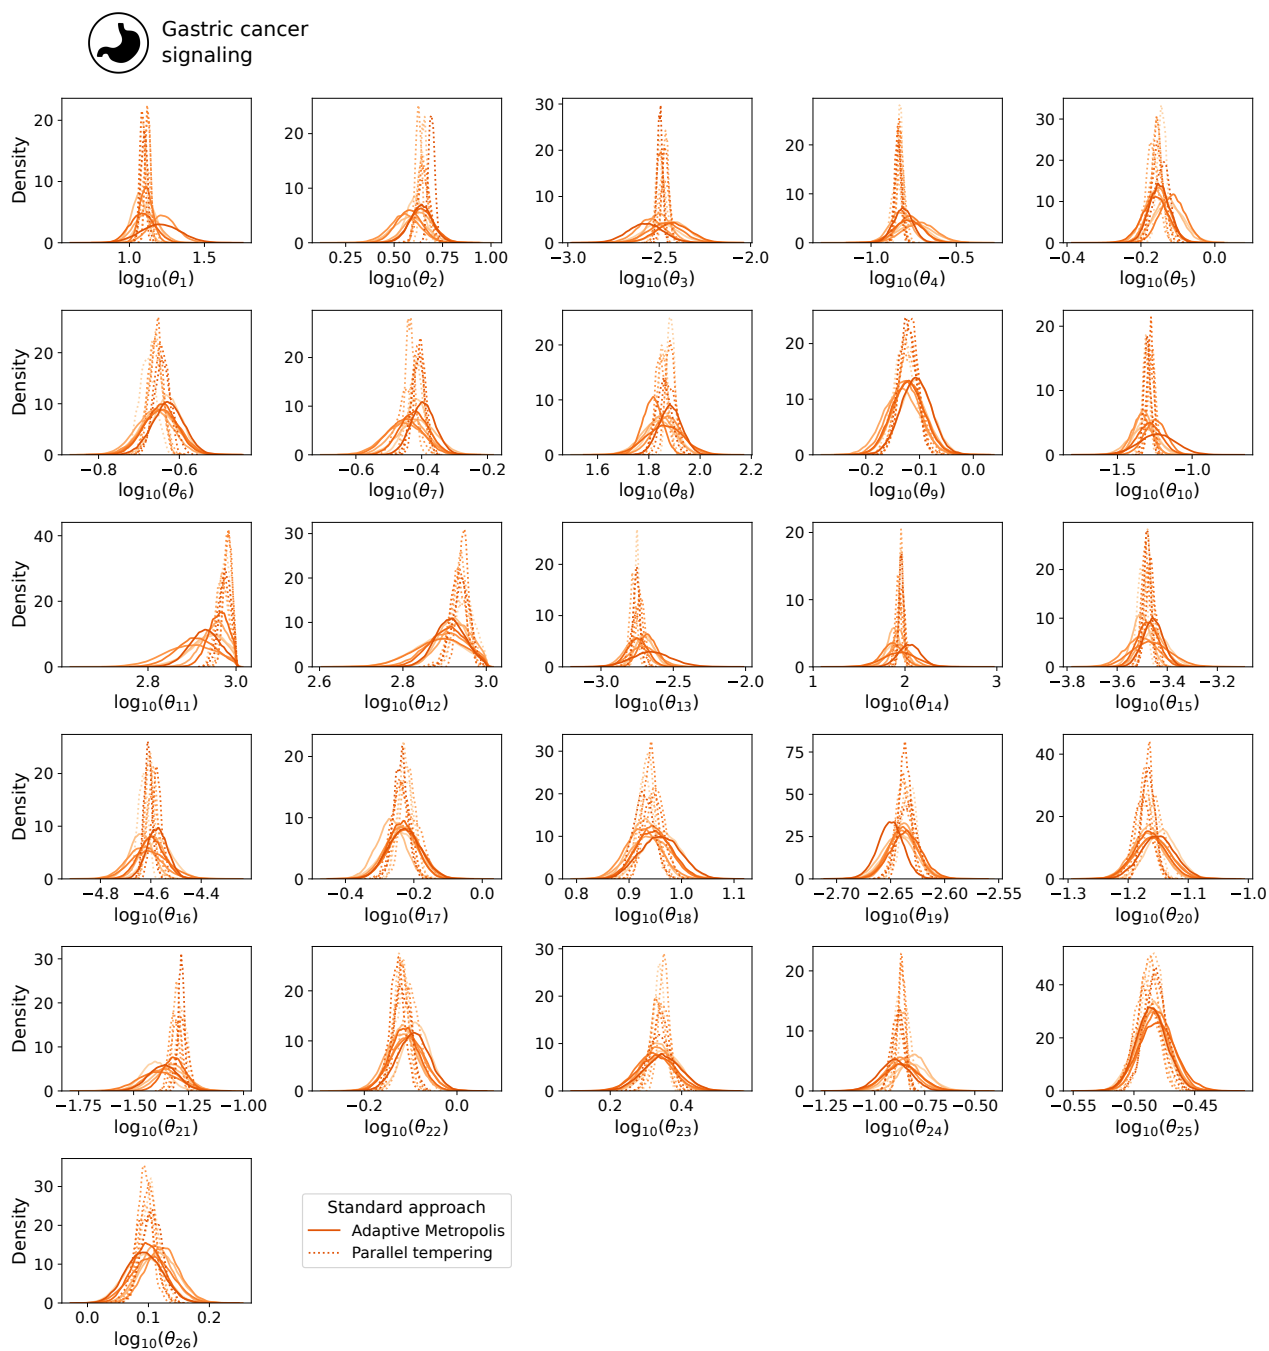

Figure S10: **Parameter marginal posterior distributions using the standard approach for model M4.** Results from two sampling algorithms (adaptive Metropolis and parallel tempering) and only the subset of model parameters are shown. The marginals were computed using a kernel density estimate.

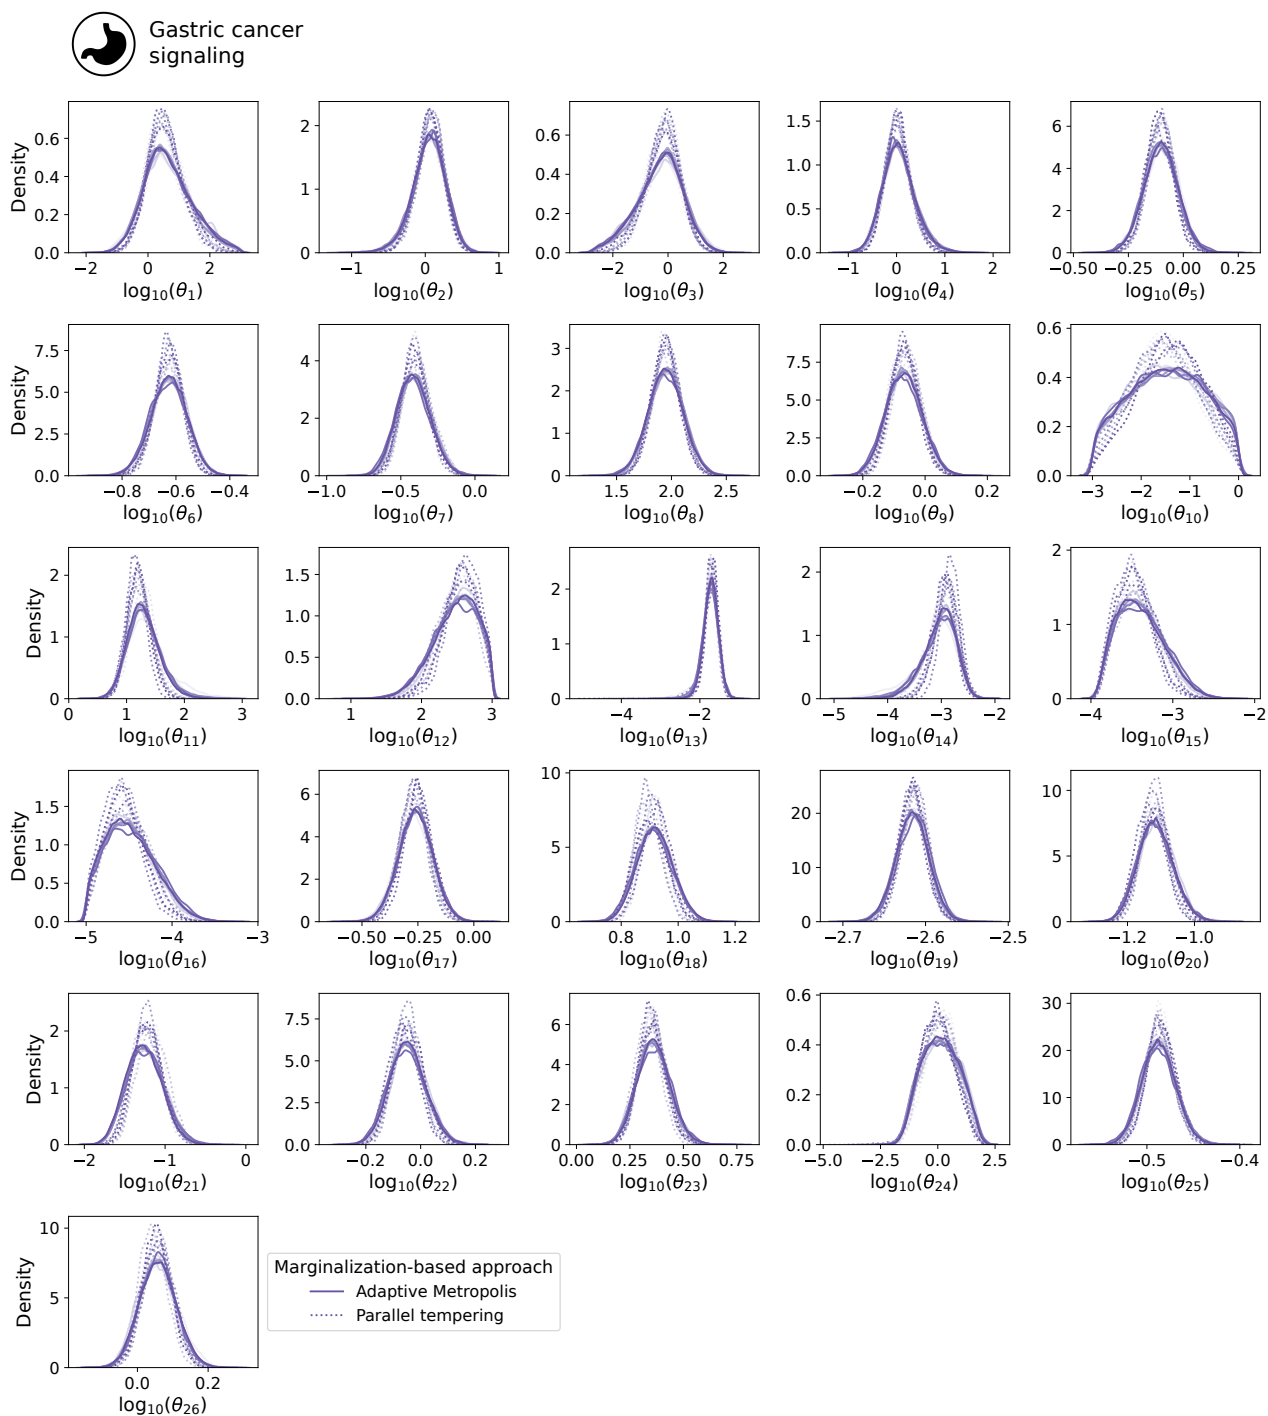

Figure S11: **Parameter marginal posterior distributions using the marginalization-based approach for model M4.** Results from two sampling algorithms (adaptive Metropolis and parallel tempering) and only the subset of model parameters are shown. The marginals were computed using a kernel density estimate.

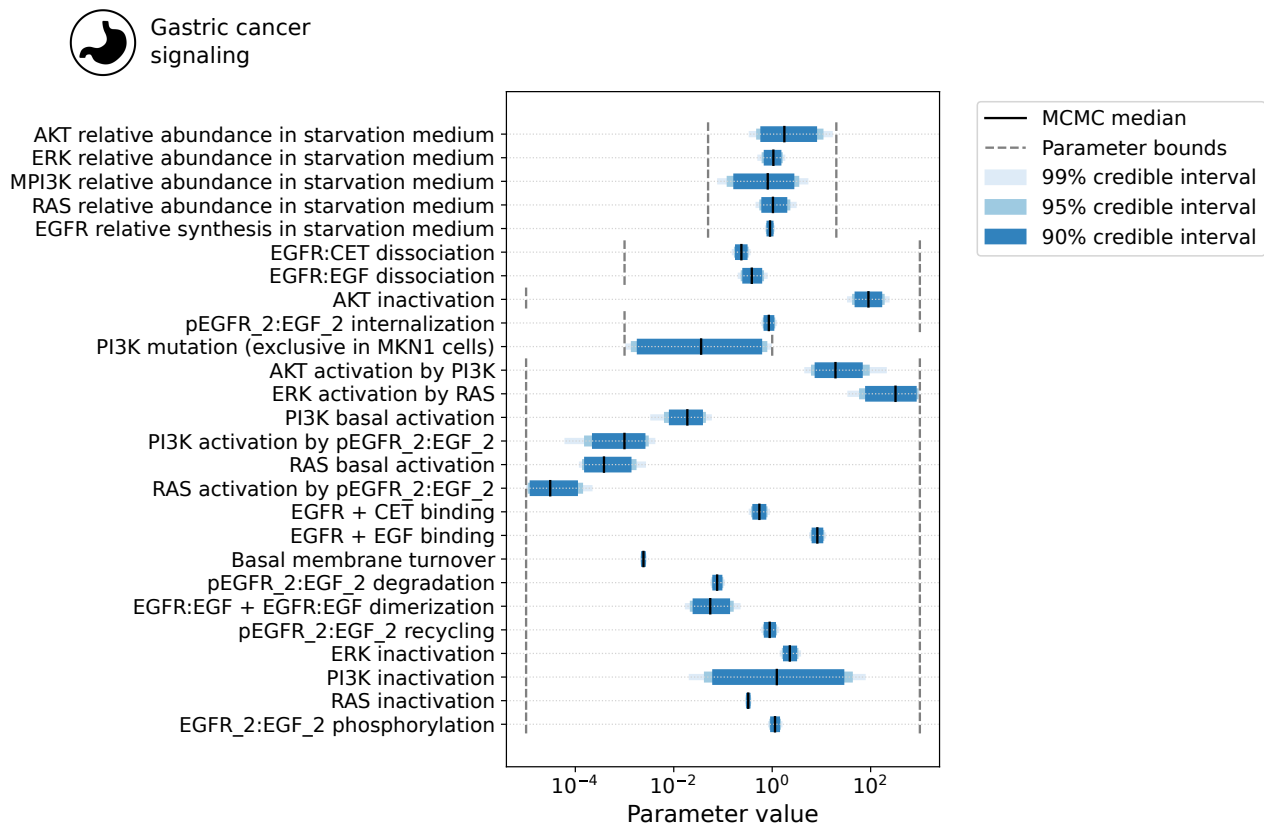

Figure S12: **Credible intervals for the model parameters of model M4.** The credible intervals were extracted from the MCMC samples obtained with the marginalization-based approach. The credible levels 90%, 95% and 99% are shown. Parameter bounds used for sampling are indicated in black dashed lines. Only the subset of model parameters are shown.

Table S1: **Overview of the marginalization-based approach applied to different observable combinations under unknown additive and multiplicative Gaussian measurement noise.** Observation parameters considered are scaling factors ( $s$ ) and offsets ( $b$ ). The noise is denoted as precision  $\lambda := 1/\sigma^2$ . For multiplicative noise, the logarithm of the scaling factor ( $s_{\log}$ ) is used. Unknown/estimated observation parameters are denoted by  $\checkmark$ , otherwise the fixed numerical value is shown. Further details for each case are in the *Supplementary Material*.

|                | $s$          | $b$          | $\lambda$    | Prior distribution                                                                                                                                                                                                                                                                                                                                                                                                                                                                      | Analytical solution                                                                                                                                                                                                                                                                                                                                                                                                                                                                                                                                                                                                                         | Conditional sampling                                                                                                                                                                                                                                                                                                                                                                                                                                                                                                                                                                                 |
|----------------|--------------|--------------|--------------|-----------------------------------------------------------------------------------------------------------------------------------------------------------------------------------------------------------------------------------------------------------------------------------------------------------------------------------------------------------------------------------------------------------------------------------------------------------------------------------------|---------------------------------------------------------------------------------------------------------------------------------------------------------------------------------------------------------------------------------------------------------------------------------------------------------------------------------------------------------------------------------------------------------------------------------------------------------------------------------------------------------------------------------------------------------------------------------------------------------------------------------------------|------------------------------------------------------------------------------------------------------------------------------------------------------------------------------------------------------------------------------------------------------------------------------------------------------------------------------------------------------------------------------------------------------------------------------------------------------------------------------------------------------------------------------------------------------------------------------------------------------|
| Additive       | $\checkmark$ | $\checkmark$ | $\checkmark$ | $p(s, b, \lambda \mid \nu, \tau, \mu, \kappa, \alpha, \beta) =$<br>$= \mathcal{N}(s \mid \nu, (\lambda\tau)^{-1}) \cdot \mathcal{N}(b \mid \mu, (\lambda\kappa)^{-1}) \cdot \Gamma(\lambda \mid \alpha, \beta)$<br>$= \sqrt{\frac{\lambda\tau}{2\pi}} \exp\left(-\frac{\lambda\tau(s-\nu)^2}{2}\right) \cdot \sqrt{\frac{\lambda\kappa}{2\pi}} \exp\left(-\frac{\kappa\lambda(b-\mu)^2}{2}\right)$<br>$\cdot \frac{\lambda^{\alpha-1}\beta^\alpha}{\Gamma(\alpha)} \exp(-\beta\lambda)$ | $p(\mathcal{D} \mid \theta) = \frac{(\beta/C)^\alpha}{\Gamma(\alpha)(2\pi C)^{n_t/2}} \cdot \Gamma\left(\alpha + \frac{n_t}{2}\right) \cdot \sqrt{\frac{\kappa\tau}{(\kappa+n_t)(\tau+\sum_{i=1}^{n_t} h_i^2) - (\sum_{i=1}^{n_t} h_i)^2}}$<br>with $C := \beta + \frac{1}{2} \left( \kappa\mu^2 + \tau\nu^2 + \sum_{i=1}^{n_t} \bar{y}_i^2 - \frac{(\kappa\mu + \sum_{i=1}^{n_t} \bar{y}_i)^2}{\kappa+n_t} - \frac{((\kappa\mu + \sum_{i=1}^{n_t} \bar{y}_i)(\sum_{i=1}^{n_t} h_i) - (\kappa+n_t)(\tau\nu + \sum_{i=1}^{n_t} h_i \bar{y}_i))^2}{(\kappa+n_t)(\kappa+n_t)(\tau+\sum_{i=1}^{n_t} h_i^2) - (\sum_{i=1}^{n_t} h_i)^2} \right)$ | $\lambda \propto \Gamma\left(\alpha' = \alpha + \frac{n_t}{2}, \beta' = C\right)$<br>$b \propto \mathcal{N}\left(\mu' = \frac{\kappa\mu + (\sum_{i=1}^{n_t} \bar{y}_i - h_i)}{\kappa+n_t}, \lambda' = \lambda(\kappa + n_t)\right)$<br>$s \propto \mathcal{N}\left(\mu' = \frac{(\kappa+n_t)(\tau\nu + \sum_{i=1}^{n_t} h_i \bar{y}_i) - (\kappa\mu + \sum_{i=1}^{n_t} \bar{y}_i)(\sum_{i=1}^{n_t} h_i)}{(\kappa+n_t)(\tau+\sum_{i=1}^{n_t} h_i^2) - (\sum_{i=1}^{n_t} h_i)^2}, \lambda' = \lambda\left(\tau + \sum_{i=1}^{n_t} h_i^2 - \frac{(\sum_{i=1}^{n_t} h_i)^2}{(\kappa+n_t)}\right)\right)$ |
|                | $\checkmark$ | 0            | $\checkmark$ | $p(s, \lambda \mid \mu, \kappa, \alpha, \beta) =$<br>$= \mathcal{N}(s \mid \mu, (\lambda\kappa)^{-1}) \cdot \Gamma(\lambda \mid \alpha, \beta)$<br>$= \frac{\beta^\alpha \sqrt{\kappa}}{\Gamma(\alpha)\sqrt{2\pi}} \lambda^{\alpha-1/2} \exp\left(-\beta\lambda - \frac{\kappa\lambda(s-\mu)^2}{2}\right)$                                                                                                                                                                              | $p(\mathcal{D} \mid \theta) = \frac{(\beta/C)^\alpha}{\Gamma(\alpha)(2\pi C)^{n_t/2}} \cdot \Gamma\left(\alpha + \frac{n_t}{2}\right) \cdot \sqrt{\frac{\kappa}{\kappa + \sum_{i=1}^{n_t} h_i^2}}$<br>with $C := \beta + \frac{1}{2} \left( \kappa\mu^2 + \sum_{i=1}^{n_t} \bar{y}_i^2 - \frac{(\kappa\mu + \sum_{i=1}^{n_t} \bar{y}_i h_i)^2}{\kappa + \sum_{i=1}^{n_t} h_i^2} \right)$                                                                                                                                                                                                                                                    | $\lambda \propto \text{Gamma}(\alpha' = \alpha + \frac{n_t}{2}, \beta' = C)$<br>$s \propto \mathcal{N}\left(\mu' = \frac{\kappa\mu + \sum_{i=1}^{n_t} \bar{y}_i h_i}{\kappa + \sum_{i=1}^{n_t} h_i^2}, \lambda' = \lambda(\kappa + \sum_{i=1}^{n_t} h_i^2)\right)$                                                                                                                                                                                                                                                                                                                                   |
|                | 1            | $\checkmark$ | $\checkmark$ | $p(b, \lambda \mid \mu, \kappa, \alpha, \beta) =$<br>$= \mathcal{N}(b \mid \mu, (\lambda\kappa)^{-1}) \cdot \Gamma(\lambda \mid \alpha, \beta)$<br>$= \frac{\beta^\alpha \sqrt{\kappa}}{\Gamma(\alpha)\sqrt{2\pi}} \lambda^{\alpha-1/2} \exp\left(-\beta\lambda - \frac{\kappa\lambda(b-\mu)^2}{2}\right)$                                                                                                                                                                              | $p(\mathcal{D} \mid \theta) = \frac{(\beta/C)^\alpha}{\Gamma(\alpha)(2\pi C)^{n_t/2}} \cdot \Gamma\left(\alpha + \frac{n_t}{2}\right) \cdot \sqrt{\frac{\kappa}{\kappa+n_t}}$<br>with $C := \beta + \frac{1}{2} \left( \kappa\mu^2 + \sum_{i=1}^{n_t} (\bar{y}_i - h_i)^2 - \frac{(\kappa\mu + \sum_{i=1}^{n_t} \bar{y}_i - h_i)^2}{\kappa+n_t} \right)$                                                                                                                                                                                                                                                                                    | $\lambda \propto \text{Gamma}(\alpha' = \alpha + \frac{n_t}{2}, \beta' = C)$<br>$b \propto \mathcal{N}\left(\mu' = \frac{\kappa\mu + (\sum_{i=1}^{n_t} \bar{y}_i - h_i)}{\kappa+n_t}, \lambda' = \lambda(\kappa + n_t)\right)$                                                                                                                                                                                                                                                                                                                                                                       |
|                | 1            | 0            | $\checkmark$ | $p(\lambda \mid \alpha, \beta) = \Gamma(\lambda \mid \alpha, \beta) =$<br>$= \frac{\beta^\alpha}{\Gamma(\alpha)} \lambda^{\alpha-1} \exp(-\beta\lambda)$                                                                                                                                                                                                                                                                                                                                | $p(\mathcal{D} \mid \theta) = \frac{(\beta/C)^\alpha}{\Gamma(\alpha)(2\pi C)^{n_t/2}} \cdot \Gamma\left(\alpha + \frac{n_t}{2}\right)$<br>with $C := \beta + \frac{1}{2} \sum_{i=1}^{n_t} (\bar{y}_i - h_i)^2$                                                                                                                                                                                                                                                                                                                                                                                                                              | $\lambda \propto \text{Gamma}(\alpha' = \alpha + \frac{n_t}{2}, \beta' = C)$                                                                                                                                                                                                                                                                                                                                                                                                                                                                                                                         |
| Multiplicative | $\checkmark$ | 0            | $\checkmark$ | $p(s_{\log}, \lambda \mid \mu, \kappa, \alpha, \beta) =$<br>$= \mathcal{N}(s_{\log} \mid \mu, (\lambda\kappa)^{-1}) \cdot \Gamma(\lambda \mid \alpha, \beta)$<br>$= \frac{\beta^\alpha \sqrt{\kappa}}{\Gamma(\alpha)\sqrt{2\pi}} \lambda^{\alpha-1/2} \exp\left(-\beta\lambda - \frac{\kappa\lambda(s_{\log}-\mu)^2}{2}\right)$                                                                                                                                                         | $p(\mathcal{D} \mid \theta) = \left(\prod_{i=1}^{n_t} \frac{1}{\bar{y}_i}\right) \frac{(\beta/C)^\alpha}{\Gamma(\alpha)(2\pi C)^{n_t/2}} \cdot \Gamma\left(\alpha + \frac{n_t}{2}\right) \cdot \sqrt{\frac{\kappa}{\kappa+n_t}}$<br>with $C := \beta + \frac{1}{2} \left( \kappa\mu^2 + \sum_{i=1}^{n_t} (\log(\bar{y}_i/h_i))^2 - \frac{(\kappa\mu + \sum_{i=1}^{n_t} \log(\bar{y}_i/h_i))^2}{\kappa+n_t} \right)$                                                                                                                                                                                                                         | $\lambda \propto \text{Gamma}(\alpha' = \alpha + \frac{n_t}{2}, \beta' = C)$<br>$s_{\log} \propto \mathcal{N}\left(\mu' = \frac{\kappa\mu + \sum_{i=1}^{n_t} \log(\bar{y}_i/h_i)}{\kappa+n_t}, \lambda' = \lambda(\kappa + n_t)\right)$                                                                                                                                                                                                                                                                                                                                                              |
|                | 1            | 0            | $\checkmark$ | $p(\lambda \mid \alpha, \beta) = \Gamma(\lambda \mid \alpha, \beta) =$<br>$= \frac{\beta^\alpha}{\Gamma(\alpha)} \lambda^{\alpha-1} \exp(-\beta\lambda)$                                                                                                                                                                                                                                                                                                                                | $p(\mathcal{D} \mid \theta) = \left(\prod_{i=1}^{n_t} \frac{1}{\bar{y}_i}\right) \frac{(\beta/C)^\alpha}{\Gamma(\alpha)(2\pi C)^{n_t/2}} \cdot \Gamma\left(\alpha + \frac{n_t}{2}\right)$<br>with $C := \beta + \frac{1}{2} \sum_{i=1}^{n_t} (\log(\bar{y}_i) - \log(h_i))^2$                                                                                                                                                                                                                                                                                                                                                               | $\lambda \propto \text{Gamma}(\alpha' = \alpha + \frac{n_t}{2}, \beta' = C)$                                                                                                                                                                                                                                                                                                                                                                                                                                                                                                                         |

**Table S2: Overview of the marginalization-based approach applied to different observable combinations under experimentally measured additive and multiplicative Gaussian measurement noise.** Observation parameters considered are scaling factors ( $s$ ) and offsets ( $b$ ). The experimentally measured noise is denoted as precision  $\bar{\lambda} := 1/\bar{\sigma}^2$ . For multiplicative noise, the logarithm of the scaling factor ( $s_{\log}$ ) is used. Unknown/estimated observation parameters are denoted by ✓, otherwise the fixed numerical value is shown. Further details for each case are in the *Supplementary Material*.

|                | $s$ | $b$ | Prior distribution                                                                                                                                                                                                                                                                                       | Analytical solution                                                                                                                                                                                                                                                                                                                                                                                                                                                                                                                                                                                                                                                                                                                                                                                            | Conditional sampling                                                                                                                                                                                                                                                                                                                                                                                                                                                                                                                                                                                                                                               |
|----------------|-----|-----|----------------------------------------------------------------------------------------------------------------------------------------------------------------------------------------------------------------------------------------------------------------------------------------------------------|----------------------------------------------------------------------------------------------------------------------------------------------------------------------------------------------------------------------------------------------------------------------------------------------------------------------------------------------------------------------------------------------------------------------------------------------------------------------------------------------------------------------------------------------------------------------------------------------------------------------------------------------------------------------------------------------------------------------------------------------------------------------------------------------------------------|--------------------------------------------------------------------------------------------------------------------------------------------------------------------------------------------------------------------------------------------------------------------------------------------------------------------------------------------------------------------------------------------------------------------------------------------------------------------------------------------------------------------------------------------------------------------------------------------------------------------------------------------------------------------|
| Additive       | ✓   | ✓   | $p(s, b \mid \nu, \tau, \mu, \kappa) =$<br>$= \mathcal{N}(s \mid \nu, \tau^{-1}) \cdot \mathcal{N}(b \mid \mu, \kappa^{-1})$<br>$= \sqrt{\frac{\tau}{2\pi}} \cdot \exp\left(-\frac{\tau}{2}(s - \nu)^2\right)$<br>$\cdot \sqrt{\frac{\kappa}{2\pi}} \cdot \exp\left(-\frac{\kappa}{2}(b - \mu)^2\right)$ | $p(\mathcal{D} \mid \theta) = \left(\frac{\bar{\lambda}}{2\pi}\right)^{n_t/2} \sqrt{\frac{\kappa\tau}{\bar{\lambda}((\kappa + \bar{\lambda}n_t)(\frac{\tau}{\bar{\lambda}} + \sum_{i=1}^{n_t} h_i^2) - \bar{\lambda}(\sum_{i=1}^{n_t} h_i)^2)}}$<br>$\cdot \exp\left(-\frac{1}{2}\left(\kappa\mu^2 + \tau\nu^2 + \bar{\lambda}\sum_{i=1}^{n_t} \bar{y}_i^2 - \frac{(\kappa\mu + \bar{\lambda}\sum_{i=1}^{n_t} \bar{y}_i)^2}{\kappa + \bar{\lambda}n_t} - \frac{((\kappa\mu + \bar{\lambda}\sum_{i=1}^{n_t} \bar{y}_i)(\bar{\lambda}\sum_{i=1}^{n_t} h_i) - (\kappa + \bar{\lambda}n_t)(\tau\nu + \bar{\lambda}\sum_{i=1}^{n_t} \bar{y}_i h_i))^2}{(\kappa + \bar{\lambda}n_t)((\kappa + \bar{\lambda}n_t)(\tau + \bar{\lambda}\sum_{i=1}^{n_t} h_i^2) - (\bar{\lambda}\sum_{i=1}^{n_t} h_i)^2)}\right)\right)$ | $b \propto \mathcal{N}\left(\mu' = \frac{\kappa\mu + \bar{\lambda}\sum_{i=1}^{n_t}(\bar{y}_i - h_i)}{\kappa + \bar{\lambda}n_t}, \lambda' = \kappa + \bar{\lambda}n_t\right)$<br>$s \propto \mathcal{N}\left(\mu' = \frac{(\kappa + \bar{\lambda}n_t)(\tau\nu + \bar{\lambda}\sum_{i=1}^{n_t} \bar{y}_i h_i) - (\kappa\mu + \bar{\lambda}\sum_{i=1}^{n_t} \bar{y}_i)(\bar{\lambda}\sum_{i=1}^{n_t} h_i)}{(\kappa + \bar{\lambda}n_t)(\tau + \bar{\lambda}\sum_{i=1}^{n_t} h_i^2) - (\bar{\lambda}\sum_{i=1}^{n_t} h_i)^2}, \lambda' = \tau + \bar{\lambda}\sum_{i=1}^{n_t} h_i^2 - \frac{(\bar{\lambda}\sum_{i=1}^{n_t} h_i)^2}{\kappa + \bar{\lambda}n_t}\right)$ |
|                | ✓   | 0   | $p(s \mid \mu, \kappa) = \mathcal{N}(s \mid \mu, \kappa^{-1}) =$<br>$= \sqrt{\frac{\kappa}{2\pi}} \cdot \exp\left(-\frac{\kappa}{2}(s - \mu)^2\right)$                                                                                                                                                   | $p(\mathcal{D} \mid \theta) = \left(\frac{\bar{\lambda}}{2\pi}\right)^{n_t/2} \sqrt{\frac{\kappa}{\kappa + \bar{\lambda}\sum_{i=1}^{n_t} h_i^2}}$<br>$\cdot \exp\left(-\frac{1}{2}\left(\kappa\mu^2 + \bar{\lambda}\sum_{i=1}^{n_t} \bar{y}_i^2 - \frac{(\kappa\mu + \bar{\lambda}\sum_{i=1}^{n_t} \bar{y}_i h_i)^2}{\kappa + \bar{\lambda}\sum_{i=1}^{n_t} h_i^2}\right)\right)$                                                                                                                                                                                                                                                                                                                                                                                                                              | $s \propto \mathcal{N}\left(\mu' = \frac{\kappa\mu + \bar{\lambda}\sum_{i=1}^{n_t} \bar{y}_i h_i}{\kappa + \bar{\lambda}\sum_{i=1}^{n_t} h_i^2}, \lambda' = \kappa + \bar{\lambda}\sum_{i=1}^{n_t} h_i^2\right)$                                                                                                                                                                                                                                                                                                                                                                                                                                                   |
|                | 1   | ✓   | $p(b \mid \mu, \kappa) = \mathcal{N}(b \mid \mu, \kappa^{-1}) =$<br>$= \sqrt{\frac{\kappa}{2\pi}} \cdot \exp\left(-\frac{\kappa}{2}(b - \mu)^2\right)$                                                                                                                                                   | $p(\mathcal{D} \mid \theta) = \left(\frac{\bar{\lambda}}{2\pi}\right)^{n_t/2} \sqrt{\frac{\kappa}{\kappa + \bar{\lambda}n_t}}$<br>$\cdot \exp\left(-\frac{1}{2}\left(\kappa\mu^2 + \bar{\lambda}\sum_{i=1}^{n_t} (\bar{y}_i - h_i)^2 - \frac{(\kappa\mu + \bar{\lambda}\sum_{i=1}^{n_t} (\bar{y}_i - h_i))^2}{\kappa + \bar{\lambda}n_t}\right)\right)$                                                                                                                                                                                                                                                                                                                                                                                                                                                        | $b \propto \mathcal{N}\left(\mu' = \frac{\kappa\mu + \bar{\lambda}\sum_{i=1}^{n_t}(\bar{y}_i - h_i)}{\kappa + \bar{\lambda}n_t}, \lambda' = \kappa + \bar{\lambda}n_t\right)$                                                                                                                                                                                                                                                                                                                                                                                                                                                                                      |
| Multiplicative | ✓   | 0   | $p(s_{\log} \mid \mu, \kappa) = \mathcal{N}(s_{\log} \mid \mu, \kappa^{-1}) =$<br>$= \sqrt{\frac{\kappa}{2\pi}} \cdot \exp\left(-\frac{\kappa}{2}(s_{\log} - \mu)^2\right)$                                                                                                                              | $p(\mathcal{D} \mid \theta) = \left(\frac{\bar{\lambda}}{2\pi}\right)^{n_t/2} \sqrt{\frac{\kappa}{\kappa + \bar{\lambda}n_t}} \left(\prod_{i=1}^{n_t} \frac{1}{\bar{y}_i}\right)$<br>$\cdot \exp\left(-\frac{1}{2}\left(\kappa\mu^2 + \bar{\lambda}\sum_{i=1}^{n_t} (\log(\bar{y}_i/h_i))^2 - \frac{(\kappa\mu + \bar{\lambda}\sum_{i=1}^{n_t} \log(\bar{y}_i/h_i))^2}{\kappa + \bar{\lambda}n_t}\right)\right)$                                                                                                                                                                                                                                                                                                                                                                                               | $s_{\log} \propto \mathcal{N}\left(\mu' = \frac{\kappa\mu + \bar{\lambda}\sum_{i=1}^{n_t} \log(\bar{y}_i/h_i)}{\kappa + \bar{\lambda}n_t}, \lambda' = \kappa + \bar{\lambda}n_t\right)$                                                                                                                                                                                                                                                                                                                                                                                                                                                                            |



## References

- 445 [1] Kitano, H. Systems biology: A brief overview. *Science* **295**, 1662–1664 (2002).
- 446 [2] Klipp, E., Herwig, R., Kowald, A., Wierling, C. & Lehrach, H. *Systems biology in*  
447 *practice* (Wiley-VCH, Weinheim, 2005).
- 448 [3] Schöberl, B. *et al.* Therapeutically targeting ErbB3: A key node in ligand-induced  
449 activation of the ErbB receptor–PI3K axis. *Science Signaling* **2**, ra31 (2009).
- 450 [4] Fey, D. *et al.* Signaling pathway models as biomarkers: Patient-specific simulations of  
451 JNK activity predict the survival of neuroblastoma patients. *Sci. Signal.* **8** (2015).
- 452 [5] Hass, H. *et al.* Predicting ligand-dependent tumors from multi-dimensional signaling  
453 features. *npj Syst Biol Appl* **3**, 27 (2017).
- 454 [6] Giordano, G. *et al.* Modelling the COVID-19 epidemic and implementation of  
455 population-wide interventions in Italy. *Nat Med* **26**, 855–860 (2020).
- 456 [7] Zhao, S. & Chen, H. Modeling the epidemic dynamics and control of COVID-19 outbreak  
457 in China. *Quant Biol* **8**, 11–19 (2020).
- 458 [8] Renart, J., Reiser, J. & Stark, G. R. Transfer of proteins from gels to diazobenzyl-  
459 oxymethyl-paper and detection with antisera: A method for studying antibody speci-  
460 ficity and antigen structure. *Proc. Natl. Acad. Sci. USA* **76**, 3116–3120 (1979).
- 461 [9] Sanderson, M. J., Smith, I., Parker, I. & Bootman, M. D. Fluorescence Microscopy. *Cold*  
462 *Spring Harb. Protoc.* **2014** (2014). URL <https://doi.org/10.1101/pdb.top071795>.
- 463 [10] Blasi, T. *et al.* Combinatorial histone acetylation patterns are generated by motif-specific  
464 reactions. *Cell Systems* **2**, 49–58 (2016).
- 465 [11] Kreutz, C. *et al.* An error model for protein quantification. *Bioinformatics* **23**, 2747–  
466 2753 (2007).
- 467 [12] Raue, A. *et al.* Lessons learned from quantitative dynamical modeling in systems biology.  
468 *PLoS ONE* **8**, e74335 (2013).
- 469 [13] Degasperi, A., Fey, D. & Kholodenko, B. N. Performance of objective functions and  
470 optimisation procedures for parameter estimation in system biology models. *npj Syst*  
471 *Biol Appl* **3**, 20 (2017).
- 472 [14] Weber, P., Hasenauer, J., Allgöwer, F. & Radde, N. Parameter estimation and identifica-  
473 bility of biological networks using relative data. In Bittanti, S., Cenedese, A. & Zampieri,  
474 S. (eds.) *Proc. of the 18th IFAC World Congress*, vol. 18, 11648–11653 (Milano, Italy,  
475 2011).
- 476

- 477 [15] Xu, T.-R. *et al.* Inferring signaling pathway topologies from multiple perturbation mea-  
478 surements of specific biochemical species. *Sci. Signal.* **3**, ra20 (2010).
- 479 [16] Raue, A., Kreutz, C., Theis, F. J. & Timmer, J. Joining forces of Bayesian and frequen-  
480 tist methodology: A study for inference in the presence of non-identifiability. *Philos T*  
481 *Roy Soc A* **371** (2013).
- 482 [17] Hug, S. *et al.* High-dimensional Bayesian parameter estimation: Case study for a model  
483 of JAK2/STAT5 signaling. *Math. Biosci.* **246**, 293–304 (2013).
- 484 [18] Haario, H., Saksman, E. & Tamminen, J. An adaptive Metropolis algorithm. *Bernoulli*  
485 **7**, 223–242 (2001).
- 486 [19] Graham, M. M. & Storkey, A. J. Continuously tempered hamiltonian monte carlo. In  
487 *UAI* (2017).
- 488 [20] Hoffman, M. D. & Gelman, A. The No-U-turn sampler: Adaptively setting path lengths  
489 in Hamiltonian Monte Carlo. *Journal of Machine Learning Research* **15**, 1593–1623  
490 (2014).
- 491 [21] Lacki, M. K. & Miasojedow, B. State-dependent swap strategies and automatic reduction  
492 of number of temperatures in adaptive parallel tempering algorithm. *Stat. Comput.* **26**,  
493 951–964 (2015).
- 494 [22] Bellman, R. E. *Adaptive Control Processes* (Princeton University Press, 1961). URL  
495 <https://doi.org/10.1515/9781400874668>.
- 496 [23] Taylor, A. N. & Kitching, T. D. Analytic methods for cosmological likelihoods. *Monthly*  
497 *Notices of the Royal Astronomical Society* **408**, 865–875 (2010). URL [https://doi.org/](https://doi.org/10.1111/j.1365-2966.2010.17201.x)  
498 [10.1111/j.1365-2966.2010.17201.x](https://doi.org/10.1111/j.1365-2966.2010.17201.x).
- 499 [24] Loos, C., Krause, S. & Hasenauer, J. Hierarchical optimization for the efficient  
500 parametrization of ODE models. *Bioinf.* **34**, 4266–4273 (2018).
- 501 [25] Schmiester, L., Schälte, Y., Fröhlich, F., Hasenauer, J. & Weindl, D. Effi-  
502 cient parameterization of large-scale dynamic models based on relative measure-  
503 ments. *Bioinformatics* **36**, 594–602 (2019). URL [https://doi.org/10.1093/](https://doi.org/10.1093/bioinformatics/btz581)  
504 [bioinformatics/btz581](https://doi.org/10.1093/bioinformatics/btz581). [https://academic.oup.com/bioinformatics/article-](https://academic.oup.com/bioinformatics/article-pdf/36/2/594/31962762/btz581.pdf)  
505 [pdf/36/2/594/31962762/btz581.pdf](https://academic.oup.com/bioinformatics/article-pdf/36/2/594/31962762/btz581.pdf).
- 506 [26] Bachmann, J. *et al.* Division of labor by dual feedback regulators controls JAK2/STAT5  
507 signaling over broad ligand range. *Mol. Syst. Biol.* **7**, 516 (2011).
- 508 [27] Raimúndez, E. *et al.* Model-based analysis of response and resistance factors of cetux-  
509 imab treatment in gastric cancer cell lines. *PLoS Comput. Biol.* **16**, e1007147 (2020).

- 510 [28] Maier, C., Loos, C. & Hasenauer, J. Robust parameter estimation for dynamical systems  
511 from outlier-corrupted data. *Bioinformatics* **33**, 718–725 (2017).
- 512 [29] Fujita, K. A. *et al.* Decoupling of receptor and downstream signals in the Akt pathway  
513 by its low-pass filter characteristics. *Sci Signal* **3**, ra56 (2010).
- 514 [30] Boehm, M. E. *et al.* Identification of isoform-specific dynamics in phosphorylation-  
515 dependent STAT5 dimerization by quantitative mass spectrometry and mathematical  
516 modeling. *Journal of Proteome Research* **13**, 5685–5694 (2014).
- 517 [31] Leonhardt, C. *et al.* Single-cell mRNA transfection studies: Delivery, kinetics and statis-  
518 tics by numbers. *Nanomedicine: Nanotechnology, Biology, and Medicine* **10**, 679–688  
519 (2014).
- 520 [32] Hasenauer, J., Hasenauer, C., Hucho, T. & Theis, F. J. ODE constrained mixture  
521 modelling: A method for unraveling subpopulation structures and dynamics. *PLoS*  
522 *Comput. Biol.* **10**, e1003686 (2014).
- 523 [33] Geweke, J. Evaluating the accuracy of sampling-based approaches to the calculation of  
524 posterior moments. In Bernardo, J. M., Smith, A. F. M., Dawid, A. P. & Berger, J. O.  
525 (eds.) *Bayesian Statistics*, vol. 4, 169–193 (University Press Oxford, 1992).
- 526 [34] Henkelman, G. & Jónsson, H. Improved tangent estimate in the nudged elastic band  
527 method for finding minimum energy paths and saddle points **113**, 9978–9985 (2000).  
528 URL <https://doi.org/10.1063/1.1323224>.
- 529 [35] McInnes, L., Healy, J., Saul, N. & Großberger, L. UMAP: Uniform Manifold Ap-  
530 proximation and Projection. *Journal of Open Source Software* **3**, 861 (2018). URL  
531 <https://doi.org/10.21105/joss.00861>.
- 532 [36] Girolami, M. & Calderhead, B. Riemann manifold Langevin and Hamiltonian Monte  
533 Carlo methods. *J. R. Statist. Soc. B* **73**, 123–214 (2011).
- 534 [37] Paszke, A. *et al.* Automatic differentiation in PyTorch (2017).
- 535 [38] Villaverde, A. F., Raimúndez, E., Hasenauer, J. & Banga, J. R. A comparison of methods  
536 for quantifying prediction uncertainty in systems biology. *IFAC-PapersOnLine* (2019).
- 537 [39] Sisson, S. A., Fan, Y. & Tanaka, M. M. Sequential Monte Carlo without likelihoods.  
538 *Proc. Natl. Acad. Sci.* **104**, 1760–1765 (2007).
- 539 [40] Toni, T., Ozaki, Y.-i., Kirk, P., Kuroda, S. & Stumpf, M. P. H. Elucidating the in vivo  
540 phosphorylation dynamics of the ERK MAP kinase using quantitative proteomics data  
541 and Bayesian model selection. *Mol. Biosyst.* **8**, 1921–1929 (2012).

- 542 [41] Schälte, Y. & Hasenauer, J. Efficient exact inference for dynamical systems with noisy  
543 measurements using sequential approximate Bayesian computation. *Bioinformatics* **36**,  
544 i551–i559 (2020).
- 545 [42] Villaverde, A. F., Froehlich, F., Weindl, D., Hasenauer, J. & Banga, J. R. Benchmarking  
546 optimization methods for parameter estimation in large kinetic models. *Bioinformatics*  
547 bty736 (2018).
- 548 [43] Fröhlich, F. & Sorger, P. K. Fides: Reliable trust-region optimization for parameter  
549 estimation of ordinary differential equation models. *PLoS Comput. Biol.* **18**, e1010322  
550 (2022). URL <https://doi.org/10.1371/journal.pcbi.1010322>.
- 551 [44] Hass, H. *et al.* Benchmark problems for dynamic modeling of intracellular processes.  
552 *Bioinformatics* **35**, 3073–3082 (2019). [https://academic.oup.com/bioinformatics/  
553 article-pdf/35/17/3073/29591749/btz020.pdf](https://academic.oup.com/bioinformatics/article-pdf/35/17/3073/29591749/btz020.pdf).
- 554 [45] Kreutz, C. New concepts for evaluating the performance of computational methods.  
555 *IFAC-PapersOnLine* **49**, 63–70 (2016).
- 556 [46] Ballnus, B. *et al.* Comprehensive benchmarking of Markov chain Monte Carlo methods  
557 for dynamical systems. *BMC Syst Biol* **11**, 63 (2017).
- 558 [47] Vousden, W., Farr, W. & Mandel, I. Dynamic temperature selection for parallel temper-  
559 ing in Markov chain Monte Carlo simulations. *Mon. Not. R. Astron. Soc.* **455**, 1919–1937  
560 (2016).
- 561 [48] Miasojedow, B., Moulines, E. & Vihola, M. An adaptive parallel tempering algorithm.  
562 *J. Comput. Graph. Stat.* **22**, 649–664 (2013).
- 563 [49] Schälte, Y. *et al.* pyPESTO - Parameter ESTimation TOolbox for python (2021). URL  
564 <https://zenodo.org/record/2553546>.
- 565 [50] Haario, H., Laine, M., Mira, A. & Saksman, E. DRAM: Efficient adaptive MCMC. *Stat.*  
566 *Comp.* **16**, 339–354 (2006).
- 567 [51] Schmiester, L. *et al.* PTab—interoperable specification of parameter estimation prob-  
568 lems in systems biology. *PLoS Computational Biology* **17**, 1–10 (2021).
- 569 [52] Fröhlich, F. *et al.* AMICI: High-performance sensitivity analysis for large or-  
570 dinary differential equation models. *Bioinformatics* **btab227** (2021). Btab227,  
571 [https://academic.oup.com/bioinformatics/advance-article-pdf/doi/10.1093/  
572 bioinformatics/btab227/37371345/btab227.pdf](https://academic.oup.com/bioinformatics/advance-article-pdf/doi/10.1093/bioinformatics/btab227/37371345/btab227.pdf).
